# Supplementary material for: Dual-modal metabolic analysis reveals hypothermia-reversible uncoupling of oxidative phosphorylation in neonatal brain hypoxia-ischemia
Source: eLife. 2025 Dec 29;13:RP100129. doi: 10.7554/eLife.100129 (PMC12747520; doi:10.7554/eLife.100129)
Supplement: Figure 1—source data 1. [file elife-100129-fig1-data1.xlsx]

## Sheet: Figure 1E
CBF	mouse #1	mouse #2	mouse #3	mouse #4	Unit: mL/100g/min
37 °C	36.4972	39.4574	40.7437	36.799
32 °C	32.1065	29.5474	37.4471	33.6364
29 °C	26.4541	25.4147	18.9987	19.7472
OEF	mouse #1	mouse #2	mouse #3	mouse #4	Unit: N/A
37 °C	0.2307	0.2028	0.2547	0.2614
32 °C	0.2157	0.2345	0.2466	0.2474
29 °C	0.1955	0.1677	0.2137	0.2341
CMRO2	mouse #1	mouse #2	mouse #3	mouse #4	Unit: mL/100g/min
37 °C	2.1049	1.9955	2.5911	2.3994
32 °C	1.7313	1.7306	2.3041	2.0802
29 °C	1.2929	1.0639	1.0135	1.1541
