# Supplementary material for: Dual-modal metabolic analysis reveals hypothermia-reversible uncoupling of oxidative phosphorylation in neonatal brain hypoxia-ischemia
Source: eLife. 2025 Dec 29;13:RP100129. doi: 10.7554/eLife.100129 (PMC12747520; doi:10.7554/eLife.100129)
Supplement: Figure 1—source data 2. [file elife-100129-fig1-data2.xlsx]

## Sheet: Figure 1G
CBF	mouse #1	mouse #2	mouse #3	mouse #4	mouse #5	Unit: mL/100g/min
Normoxia	27.9801	23.8018	22.3321	20.1126	25.9657
Hypoxia	32.6846	26.7807	35.5079	25.0459	33.6642
OEF	mouse #1	mouse #2	mouse #3	mouse #4	mouse #5	Unit: N/A
Normoxia	0.181174	0.157907	0.11511	0.190144	0.184565
Hypoxia	0.313431	0.34961	0.168636	0.272861	0.337986
CMRO2	mouse #1	mouse #2	mouse #3	mouse #4	mouse #5	Unit: mL/100g/min
Normoxia	1.12282	0.861561	0.573601	0.871401	1.10844
Hypoxia	1.88438	1.60693	1.10437	1.16171	1.81468
