# Supplementary material for: Dual-modal metabolic analysis reveals hypothermia-reversible uncoupling of oxidative phosphorylation in neonatal brain hypoxia-ischemia
Source: eLife. 2025 Dec 29;13:RP100129. doi: 10.7554/eLife.100129 (PMC12747520; doi:10.7554/eLife.100129)
Supplement: Figure 2—figure supplement 1—source data 1. [file elife-100129-fig2-figsupp1-data1.xlsx]

## Sheet: Figure S2A
Oxygen Concentration @ 2h Post-HI						Unit: nmol/mL
UN		CL		IL		UN: uninjured
Time (s)	Value	Time (s)	Value	Time (s)	Value	CL: Contralateral
4.1325	216.636	29.1694	209.114	43.5239	208.347	IL: Ipsilateral (CCA-ligated)
4.99097	215.224	33.843	211.208	49.9142	208.143
4.73337	213.923	57.2583	209.799	58.2121	207.388
5.80169	212.889	89.3055	209.692	68.4836	207.827
6.80311	211.46	99.4395	208.868	72.2935	207.33
9.93589	210.158	102.277	208.733	79.5769	207.488
8.70334	208.454	117.299	208.363	87.1993	207.084
7.80463	206.688	132.655	207.979	94.2652	206.552
15.1184	210.143	155.689	207.126	101.609	206.495
20.2515	209.024	155.689	205.41	108.954	206.157
27.4669	210.327	172.38	204.844	116.298	206.167
34.8444	210.269	179.915	203.872	123.642	206.072
35.3452	209.356	182.395	200.169	130.318	205.9
42.8562	210.376	189.071	197.378	149.68	205.067
49.5327	209.911	193.411	192.937	161.698	204.682
55.0793	208.764	194.079	195.577	168.617	202.263
62.218	209.276	194.746	188.69	171.379	201.071
69.5622	209.406	195.08	191.816	173.567	199.865
76.9064	209.148	196.749	190.205	175.663	198.752
84.2504	208.814	198.705	186.845	178.256	197.537
91.5946	208.327	202.313	186.208	180.325	196.392
98.9387	208.205	207.432	186.663	183.063	195.244
106.283	207.589	209.769	184.734	184.62	193.947
113.627	207.752	219.95	183.244	187.736	192.888
120.971	207.541	224.457	181.579	189.339	191.589
128.315	207.326	229.531	179.848	193.609	188.653
135.66	206.725	236.475	178.533	203.426	184.921
139.732	206.431	242.929	176.26	204.761	183.774
147.01	206.644	247.825	175.394	207.341	182.426
154.354	206.394	253.166	173.793	209.769	181.228
162.321	205.913	261.474	171.86	212.075	180.108
168.47	204.11	267.706	170.406	214.91	178.863
176.219	203.373	271.526	170.269	217.113	177.68
179.057	202.543	276.033	168.423	219.533	175.449
184.481	200.953	281.541	166.067	219.783	176.721
189.405	199.313	288.265	163.802	221.119	174.194
194.279	197.651	295.418	162.05	222.499	171.531
199.337	196.317	300.495	160.535	223.122	172.792
207.003	196.824	307.079	158.942	225.993	170.931
207.098	198.372	312.587	157.912	230.744	172.134
210.436	196.528	318.929	156.454	233.565	170.898
211.772	194.893	320.598	155.256	236.141	172.153
216.723	193.064	326.607	153.383	237.524	168.256
222.955	192.692	331.281	152.213	237.81	169.921
226.46	191.093	340.628	150.997	239.813	167.302
232.755	189.713	344.825	149.075	241.482	165.99
237.075	188.458	350.91	147.952	242.792	164.555
242.442	186.908	356.429	145.429	245.822	163.352
246.99	186.757	356.735	146.492	249.16	162.179
249.382	185.491	361.881	145.816	249.879	160.73
252.164	184.169	365.609	144.14	253.5	159.551
257.354	182.694	370.364	143.305	255.836	158.165
263.225	181.896	373.51	144.011	257.458	157.056
270.58	185.144	376.598	142.255	259.341	155.812
271.359	183.627	379.161	140.054	262.179	154.514
270.73	182.465	386.306	138.414	264.152	153.446
276.385	181.413	391.986	138.437	267.776	151.775
275.866	179.825	397.14	136.708	270.95	150.255
275.91	178.592	403.864	135.912	272.861	148.97
277.821	183.994	405.39	133.243	275.198	147.759
276.979	182.759	406.725	134.139	277.401	146.48
279.872	181.24	416.656	131.14	280.206	145.182
279.872	180.084	417.598	129.857	282.178	143.84
281.207	178.642	424.251	131.014	285.881	142.324
283.21	177.1	425.419	130.072	288.408	140.582
283.271	175.994	428.479	127.77	292.608	139.593
288.217	175.107	433.031	125.702	295.339	138.086
288.855	173.544	440.775	125.635	297.305	136.613
292.254	172.313	444.781	125.569	299.957	135.096
297.326	170.862	445.449	124.476	302.238	133.731
299.711	170.379	448.654	122.368	305.042	132.573
305.91	171.875	453.461	122.105	307.394	131.301
306.274	170.483	457.615	120.943	308.664	129.693
309.248	169.127	460.063	119.265	313.833	128.133
312.587	167.684	465.729	117.886	318.262	126.935
316.163	166.391	470.152	116.949	320.902	125.422
321.361	165.237	480.167	114.725	323.269	123.783
326.44	163.871	482.336	113.252	326.088	121.843
331.281	162.555	487.177	112.942	331.281	120.44
337.29	161.306	489.848	111.616	335.601	118.604
342.965	159.79	495.856	111.011	341.2	117.671
347.137	158.48	499.009	109.918	347.383	117.545
351.31	157.815	503.534	109.242	355.672	117.054
354.238	156.551	509.209	107.772	362.749	116.398
359.656	155.361	523.23	107.735	368.423	115.503
363.996	153.983	541.256	107.44	375.135	115.744
367.853	152.691	549.101	106.741	382.69	116.032
369.432	151.041	556.517	105.544	388.773	115.796
373.343	153.999	563.957	106.186	390.702	114.766
373.343	152.849	573.248	105.329	395.894	113.697
374.455	151.66	578.645	105.629	402.23	114.224
380.782	149.161	579.646	106.781	410.063	114.053
383.892	148.624	587.859	105.157	416.835	113.513
388.966	147.742	593.667	104.937	422.081	112.919
395.208	146.469	603.014	104.761	429.381	112.823
399.339	145.847	613.697	103.965	436.34	112.416
404.322	143.929	618.593	103.478	444.114	112.07
408.617	142.533	624.379	103.777	451.406	111.663
412.916	141.236	635.729	102.796	457.775	111.162
417.686	139.725	643.073	102.624	465.478	111.009
422.749	139.037	650.195	102.934	472.393	110.501
427.719	137.79	656.001	101.882	479.46	109.854
431.762	136.575	662.435	101.697	486.543	109.92
437.859	135.315	670.78	101.328	491.183	110.06
443.112	136.259	676.975	99.7576	498.527	108.282
443.446	134.823	684.067	99.2537	500.864	107.014
446.45	133.162	691.478	97.9549	502.199	105.743
451.458	132.043	703.533	94.4643	504.081	104.276
455.515	131.116	710.172	93.3854	505.204	103.023
459.87	129.424	718.466	91.9009	507.601	101.686
466.202	128.384	725.194	91.0422	510.01	97.9101
469.866	126.877	725.194	89.6209	510.211	100.482
473.156	125.064	730.313	88.4469	510.211	99.3257
475.493	124.134	736.377	88.1231	513.438	94.3792
481.335	123.845	740.216	86.9682	513.466	96.5073
487.177	122.342	747.627	85.1496	514.217	95.4315
492.451	120.916	755.706	83.8521	520.493	95.6332
498.861	119.625	760.691	83.0292	522.896	94.1011
506.205	119.326	765.253	82.2117	523.861	90.6949
513.584	119.549	766.292	80.9031	524.596	92.2319
520.226	118.184	772.597	80.4026	525.901	89.6333
527.792	117.873	785.95	77.8022	528.386	88.3449
535.343	117.068	789.288	76.5336	529.506	86.9818
542.258	117.372	798.635	74.8861	532	85.5967
550.174	116.44	803.087	73.6982	534.671	84.0417
553.052	116.115	813.324	72.3268	536.583	82.5885
559.617	116.323	815.812	70.6579	538.503	81.2544
565.677	116.253	823.052	69.2127	540.589	79.5776
570.756	115.242	825.341	69.803	543.229	77.8265
578.311	115.969	833.27	68.0212	545.196	76.181
585.655	115.334	854.05	63.2543	546.598	74.6298
588.326	114.558	859.391	63.0288	548	73.3414
595.67	115.105	861.061	61.4528	549.513	71.8002
603.014	114.709	864.788	60.1093	554.61	70.1273
610.358	114.406	870.007	59.844	556.946	68.6571
617.443	113.434	875.415	58.4639	558.949	67.2176
625.047	113.775	880.423	57.7189	560.151	65.7987
632.613	113.338	888.434	55.7517	561.954	64.557
639.735	112.614	905.726	53.3233	563.289	63.2868
639.651	111.855	909.549	51.6259	564.776	61.865
648.025	112.81	910.801	50.9218	568.245	60.4618
654.646	111.339	920.148	48.4626	570.411	58.846
653.422	112.756	920.625	49.3413	573.304	57.3792
655.091	111.819	933.334	46.8203	574.184	55.8179
662.435	111.679	937.952	45.8836	576.065	54.4241
668.944	111.654	945.685	44.5118	578.311	53.2711
673.481	110.112	951.861	43.6958	580.611	52.0098
676.4	109.185	955.199	41.5964	582.317	50.8978
683.466	109.161	963.456	40.6041	583.986	49.5856
688.473	107.857	967.885	40.3658	585.588	47.9389
694.148	107.448	970.088	38.8215	586.59	46.5314
698.154	106.213	975.229	38.5943	589.29	42.3254
701.826	104.895	983.24	37.0098	589.327	45.3985
708.503	103.941	985.196	36.0015	589.783	43.8529
712.509	102.77	998.663	34.1318	592.789	40.7602
719.519	101.844	999.264	32.8023	596.783	39.7709
724.793	100.556	1005.61	30.2471	599.676	39.7097
727.197	99.4834	1006.11	31.1031	599.771	38.298
731.203	98.5076			604.349	36.9261
738.28	97.6874			605.745	35.0821
744.042	96.2894			607.534	33.2716
748.562	94.7062			611.109	31.4674
755.572	94.1307			613.029	30.5589
760.505	92.7802
764.585	91.5156
770.928	90.9354
776.937	89.5643
781.944	88.4739
784.949	87.2816
791.625	86.5229
797.3	85.3556
802.975	84.0221
809.318	82.9512
813.889	81.2526
818.776	79.6011
824.492	79.2282
829.347	78.4807
834.967	77.725
840.03	78.8652
840.03	77.5361
843.702	76.0524
848.042	74.8856
854.384	73.2719
859.452	72.0858
863.922	70.4965
870.608	70.519
877.418	68.9408
884.846	68.3936
887.099	69.8658
887.433	72.0397
887.099	70.9177
888.991	67.8001
892.42	66.2663
896.112	64.6833
900.54	62.7822
906.37	62.0609
909.054	61.0762
913.304	59.6247
914.806	58.024
920.815	60.4882
922.484	61.6499
926.157	59.8174
927.826	58.596
931.498	57.2587
938.071	56.2035
943.582	54.8048
948.272	53.785
955.287	52.6113
959.539	52.3678
961.208	51.3393
965.184	50.1661
971.89	48.7659
978.901	47.2504
985.911	46.1711
988.439	45.4637
994.19	44.672
999.264	43.3565
1004	41.4592
1007.61	40.2344
