# Supplementary material for: Dual-modal metabolic analysis reveals hypothermia-reversible uncoupling of oxidative phosphorylation in neonatal brain hypoxia-ischemia
Source: eLife. 2025 Dec 29;13:RP100129. doi: 10.7554/eLife.100129 (PMC12747520; doi:10.7554/eLife.100129)
Supplement: Figure 2—figure supplement 1—source data 2. [file elife-100129-fig2-figsupp1-data2.xlsx]

## Sheet: Figure S2B
Oxygen Concentration @ 5h Post-HI						Unit: nmol/mL
UN		CL		IL		UN: uninjured
Time (s)	Value	Time (s)	Value	Time (s)	Value	CL: Contralateral
4.62059	217.609	8.02208	212.498	12.4729	209.64	IL: Ipsilateral (CCA-ligated)
6.39371	213.911	10.9531	210.317	30.6262	209.324
7.06916	212.041	19.5654	209.603	38.4183	208.455
8.42005	207.436	25.4757	207.535	42.8691	208.373
16.2725	211.496	31.4705	205.872	52.4947	207.897
20.1353	210.162	34.8142	204.607	58.4219	207.431
22.1828	211.62	41.9066	203.784	63.5892	207.338
28.2862	211.346	46.8713	202.595	69.4658	206.556
31.4705	211.558	54.2676	204.285	75.1831	206.718
38.4617	210.429	59.8404	204.483	82.4927	206.106
48.4055	209.865	65.033	203.925	88.2101	206.121
54.141	209.433	67.946	203.296	91.5031	205.197
58.3839	209.472	74.5318	204.715	96.8223	205.849
64.255	209.555	78.5846	203.826	105.181	205.135
68.4526	209.343	86.5456	203.801	110.501	204.194
76.4135	208.735	92.2629	202.831	118.269	204.442
82.1309	208.997	97.6909	203.242	123.622	203.696
87.7035	208.478	104.624	202.659	127.472	202.6
93.2254	208.71	108.981	202.27	138.111	200
98.0889	208.161	117.137	202.032	146.18	197.687
103.07	207.524	127.804	201.01	150.332	196.423
109.15	207.297	133.988	198.99	154.463	195.429
113.878	207.635	140.644	196.461	162.428	193.012
125.445	207.183	145.062	194.982	171.092	191.414
127.074	205.769	153.562	192.89	179.338	189.899
130.934	205.269	155.842	192.053	185.522	188.384
131.525	204.421	159.641	190.476	193.432	185.977
137.857	202.87	165.214	189.805	198.722	184.976
139.63	201.52	169.267	188.589	202.123	184.054
147.338	199.459	172.222	186.186	206.249	182.876
150.522	198.619	176.106	184.65	210.048	182.203
155.183	196.813	180.311	183.204	217.267	180.419
163.839	194.749	185.984	182.298	222.677	179.544
168.507	193.778	192.824	181.228	230.515	177.166
173.175	192	196.218	179.795	234.048	175.734
176.359	191.575	204.982	176.203	239.685	174.95
177.752	190.489	209.035	174.243	249.535	172.798
186.491	186.014	214.05	172.137	255.187	171.337
191	184.562	219.139	171.729	259.273	169.95
194.09	183.531	223.98	168.764	266.028	168.937
202.956	182.382	228.708	167.839	270.081	167.535
203.571	180.639	233.605	166.309	277.173	166.267
204.526	179.026	238.165	164.122	283.316	164.785
211.061	177.094	242.218	162.952	287.749	163.694
216.887	176.273	245.51	161.585	294.967	161.829
222.207	173.825	249.563	160.049	299.97	160.535
226.44	171.449	254.231	158.416	305.29	159.255
229.721	171.57	259.949	156.963	310.102	158.381
231.579	170.214	264.798	156.102	315.675	157.058
235.632	169.729	268.561	154.836	319.981	155.67
241.178	167.677	271.854	152.567	327.517	154.17
250.54	163.86	275.907	151.207	332.787	152.901
253.363	163.895	280.719	149.857	336.952	152.104
254.444	162.369	284.012	147.356	342.187	150.701
257.416	162.406	288.065	145.809	345.311	149.947
258.465	161.076	292.878	144.053	349.668	148.523
261.469	161.041	298.45	142.642	355.866	147.278
262.549	159.568	302.503	141.037	363.971	145.263
265.521	159.551	305.796	139.437	368.615	144.579
266.39	158.186	309.596	137.673	374.441	143.123
269.574	158.186	315.928	136.713	378.156	141.715
270.081	156.324	319.019	135.34	387.461	140.411
275.907	154.586	322.767	133.409	392.172	140.407
280.415	152.662	327.834	131.927	400.061	139.887
283.675	151.131	331.959	130.914	404.584	139.443
289.838	151.066	336.952	129.535	410.41	139.344
290.851	149.791	342.018	128.638	419.979	138.387
293.638	148.876	346.325	127.17	423.75	138.271
300.73	148.876	351.39	125.448	433.569	137.572
302.757	146.968	353.417	123.734	438.852	137.67
305.459	145.484	357.216	121.615	442.579	137.364
309.849	142.857	362.283	120.5	452.154	136.663
316.756	141.061	366.589	119.222	455.16	136.837
319.728	141.057	370.895	117.632	464.616	135.781
320.809	139.658	375.961	116.246	470.189	135.268
323.781	139.691	381.533	115.105	475.762	135.006
324.872	137.958	387.106	114.727	481.769	134.369
327.834	138.202	393.113	114.636	484.88	134.726
333.189	136.376	397.238	113.931	493.29	133.932
337.459	134.975	403.824	113.325	498.503	133.481
341.259	132.151	409.207	113.145	502.612	133.733
345.311	130.755	414.969	113.146	510.295	132.927
351.39	130.755	420.542	113.044	516.239	132.604
353.019	128.113	426.115	113.358	522.031	132.003
353.417	126.472	431.687	112.21	527.232	131.555
358.837	127.316	437.703	112.633	532.429	131.286
360.509	125.402	442.832	112.616	540.404	130.347
367.602	122.562	448.405	112.737	546.123	129.159
374.981	121.895	453.978	112.463	556.312	126.597
381.128	121.272	459.297	111.938	562.391	125.355
387.613	120.825	465.123	111.871	570.75	123.392
394.072	119.812	470.696	111.572	573.536	122.169
396.309	118.847	476.268	110.814	582.452	120.514
403.993	118.935	481.841	110.178	586.708	119.67
407.877	118.665	487.413	109.778	593.192	118.119
415.223	118.569	490.96	109.778	598.504	116.179
437.175	118.27	497.799	109.499	604.439	115.483
444.014	118.26	506.057	107.469	608.829	114.457
448.188	118.129	514.01	106.534	613.558	113.298
452.458	117.225	518.823	105.298	618.877	112.085
460.451	117.067	522.876	104.449	624.703	110.608
465.123	116.825	526.928	103.283	629.262	109.078
475.508	115.644	530.981	102.259	634.962	108.087
480.574	115.487	535.034	100.824	640.492	106.633
490.308	114.409	540.1	99.7343	646.487	105.1
495.519	114.269	544.406	98.5448	651.806	104.339
504.891	112.602	548.206	97.5141	657.062	102.765
505.905	113.318	552.653	95.8019	666.434	100.945
508.944	111.267	556.818	95.0768	673.337	99.3826
516.037	111.888	560.871	93.5944	676.503	97.8233
521.103	110.709	564.924	92.4214	681.949	96.7967
530.222	107.939	568.217	91.2215	687.269	95.6641
534.166	106.161	572.269	89.8903	697.654	93.4833
542.135	104.546	577.082	88.7758	700.74	92.2352
552.442	102.02	581.135	87.8175	706.671	91.0271
556.565	98.8163	584.428	86.7717	714.98	89.3556
559.858	99.1033	589.241	85.3652	721.654	87.9556
560.938	97.4359	593.294	84.6989	726.581	86.2194
567.167	96.2396	596.587	83.6431	731.307	85.441
569.737	96.5588	600.639	82.3023	735.734	83.9776
571.003	95.4135	604.692	80.8655	743.682	82.5418
577.251	94.4073	608.745	79.4897	748.821	80.7219
580.122	93.8074	613.558	77.8492	753.802	80.1746
585.188	91.987	617.611	76.7414
587.468	90.5389	621.663	75.6746
597.6	87.684	627.011	75.3338
603.932	87.2806	631.542	74.2788
607.918	84.9471	635.088	73.0476
611.599	83.377	642.13	71.694
615.711	82.8743	645.98	70.6557
624.956	81.5865	649.121	69.4256
625.137	80.3431	653.706	68.1087
630.377	80.187	658.139	66.5548
632.724	78.23	661.613	65.7197
638.164	77.1514	667.562	65.4643
645.305	76.3889	671.311	65.7143
649.78	75.1063	673.59	63.0758
652.566	74.0926	678.403	61.3904
655.353	72.0136	683.216	59.9568
660.633	70.8922	688.029	58.2154
665.029	70.2572	693.601	56.852
670.297	68.7497	698.92	56.2934
675.13	68.0424	703.48	54.4564
678.403	66.5108	708.293	53.2137
681.747	65.7516	712.345	52.0485
692.335	61.3701	716.398	50.6173
700.042	61.3334	721.464	49.7129
701.996	60.2529	726.53	48.0974
706.266	58.1429	731.596	46.6408
707.887	59.0365	736.662	45.5416
714.625	57.0258	741.728	44.7362
718.425	55.3106	746.034	42.7629
722.309	55.0398	750.087	41.109
726.254	52.9805	754.14	39.0575
730.651	51.6885
733.623	51.6885
740.968	50.3231
744.135	48.3682
753.127	45.6065
753.127	43.5274
