# Supplementary material for: Dual-modal metabolic analysis reveals hypothermia-reversible uncoupling of oxidative phosphorylation in neonatal brain hypoxia-ischemia
Source: eLife. 2025 Dec 29;13:RP100129. doi: 10.7554/eLife.100129 (PMC12747520; doi:10.7554/eLife.100129)
Supplement: Figure 2—source data 1. [file elife-100129-fig2-data1.xlsx]

## Sheet: Figure 2B
CBF		mouse #1		mouse #2		mouse #3		mouse #4		mouse #5		Unit: mL/100g/min
		CL	IL	CL	IL	CL	IL	CL	IL	CL	IL	CL: Contralateral
CCA-ligation		30.604	29.065	24.608	21.788	28.912	30.329	22.642	16.734	26.596	20.453	IL: Ipsilateral (CCA-ligated)
During HI		31.847	25.903	37.088	23.485	35.946	30.221	34.318	21.184	36.335	29.378
Post-HI (min)	0–40	32.751	26.212	42.73	23.661	32.498	28.729	38.911	32.423	37.69	30.506
	40–80	33.835	21.57	46.318	25.483	41.714	32.565	38.743	34.522	35.107	34.796
	80–120			42.127	27.223	45.94	34.442	40.536	26.584	38.799	33.665
