# Supplementary material for: Dual-modal metabolic analysis reveals hypothermia-reversible uncoupling of oxidative phosphorylation in neonatal brain hypoxia-ischemia
Source: eLife. 2025 Dec 29;13:RP100129. doi: 10.7554/eLife.100129 (PMC12747520; doi:10.7554/eLife.100129)
Supplement: Figure 2—source data 2. [file elife-100129-fig2-data2.xlsx]

## Sheet: Figure 2C
OEF		mouse #1		mouse #2		mouse #3		mouse #4		mouse #5		Unit: N/A
		CL	IL	CL	IL	CL	IL	CL	IL	CL	IL	CL: Contralateral
CCA-ligation		0.168	0.224	0.145	0.248	0.207	0.303	0.276	0.36	0.255	0.34	IL: Ipsilateral (CCA-ligated)
During HI		0.433	0.13	0.462	0.374	0.439	0.255	0.481	0.245	0.395	0.246
Post-HI (min)	0–40	0.214	0.199	0.277	0.556	0.096	0.34	0.228	0.365	0.277	0.455
	40–80	0.24	0.275	0.279	0.475	0.117	0.333	0.22	0.263	0.269	0.44
	80–120			0.374	0.449	0.124	0.338	0.243	0.278	0.253	0.296
