# Supplementary material for: Dual-modal metabolic analysis reveals hypothermia-reversible uncoupling of oxidative phosphorylation in neonatal brain hypoxia-ischemia
Source: eLife. 2025 Dec 29;13:RP100129. doi: 10.7554/eLife.100129 (PMC12747520; doi:10.7554/eLife.100129)
Supplement: Figure 2—source data 3. [file elife-100129-fig2-data3.xlsx]

## Sheet: Figure 2D
CMRO2		mouse #1		mouse #2		mouse #3		mouse #4		mouse #5		Unit: mL/100g/min
		CL	IL	CL	IL	CL	IL	CL	IL	CL	IL	CL: Contralateral
CCA-ligation		1.172	1.464	0.82	1.239	1.355	2.148	1.411	1.386	1.549	1.582	IL: Ipsilateral (CCA-ligated)
During HI		2.4	0.506	1.683	0.758	2.703	1.043	2.512	0.724	2.532	0.881
Post-HI (min)	0–40	1.56	1.121	2.448	2.65	0.708	2.205	1.936	2.565	2.333	2.935
	40–80	1.825	1.288	2.809	2.588	1.119	2.532	1.885	1.985	2.143	3.319
	80–120			3.325	2.683	1.273	2.699	2.25	1.681	2.256	2.476
