# Supplementary material for: Dual-modal metabolic analysis reveals hypothermia-reversible uncoupling of oxidative phosphorylation in neonatal brain hypoxia-ischemia
Source: eLife. 2025 Dec 29;13:RP100129. doi: 10.7554/eLife.100129 (PMC12747520; doi:10.7554/eLife.100129)
Supplement: Figure 2—source data 4. [file elife-100129-fig2-data4.xlsx]

## Sheet: Figure 2F
OCR @ 2h	mouse #1	mouse #2	mouse #3	mouse #4	mouse #5	mouse #6	mouse #7	Unit: nmol/min/mg
UN	118.868	131.267	143.127	139.084	135.04	122.102	114.825	UN: uninjured
	mouse #1	mouse #2	mouse #3	mouse #4	mouse #5	mouse #6	mouse #7	CL: Contralateral
CL	130.108	132.258	137.634	151.613	212.903	149.462	145.878	IL: Ipsilateral (CCA-ligated)
IL	98.8506	162.835	214.176	250.958	259.004	244.828	242.529
OCR @ 5h	mouse #1	mouse #2	mouse #3	mouse #4	mouse #5	mouse #6	mouse #7
UN	115.278	118.75	131.597	143.403	139.236	135.069	122.569
	mouse #1	mouse #2	mouse #3	mouse #4	mouse #5	mouse #6	mouse #7
CL	110.069	146.528	137.847	130.903	133.333	144.444	147.222
IL	42.8314	50.8623	63.8647	73.0429	79.1616	88.3398	99.4301
