# Supplementary material for: Dual-modal metabolic analysis reveals hypothermia-reversible uncoupling of oxidative phosphorylation in neonatal brain hypoxia-ischemia
Source: eLife. 2025 Dec 29;13:RP100129. doi: 10.7554/eLife.100129 (PMC12747520; doi:10.7554/eLife.100129)
Supplement: Figure 2—source data 5. [file elife-100129-fig2-data5.xlsx]

## Sheet: Figure 2G
MitoSox Red @ 2h	mouse #1	mouse #2	mouse #3	mouse #4	mouse #5	mouse #6	mouse #7	Unit: a.u.
UN	81.5104	89.0625	95.8333	100.781	104.167	101.042	96.6146	UN: uninjured
	mouse #1	mouse #2	mouse #3	mouse #4	mouse #5	mouse #6	mouse #7	CL: Contralateral
CL	94.0141	100.352	108.451	108.803	121.127	118.31		IL: Ipsilateral (CCA-ligated)
IL	103.871	109.355	130.968	137.419	136.452	142.581	155.806
MitoSox Red @ 5h	mouse #1	mouse #2	mouse #3	mouse #4	mouse #5	mouse #6	mouse #7
UN	82.2581	89.0323	96.129	100.968	103.871	100.968	97.0968
	mouse #1	mouse #2	mouse #3	mouse #4	mouse #5	mouse #6	mouse #7
CL	100.601	101.502	108.709	108.709	115.315	120.721
IL	102.97	124.422	126.403	137.624	141.584	162.706	167.327
