# Supplementary material for: Dual-modal metabolic analysis reveals hypothermia-reversible uncoupling of oxidative phosphorylation in neonatal brain hypoxia-ischemia
Source: eLife. 2025 Dec 29;13:RP100129. doi: 10.7554/eLife.100129 (PMC12747520; doi:10.7554/eLife.100129)
Supplement: Figure 2—source data 6. [file elife-100129-fig2-data6.xlsx]

## Sheet: Figure 2H
DRH-123 Fluorescence @ 2h	mouse #1	mouse #2	mouse #3	mouse #4	mouse #5	mouse #6	mouse #7	Unit: nmol/min/mg
UN	56.732	60.1307	60.915	62.8758	67.7124	70.719	72.8105	UN: uninjured
	mouse #1	mouse #2	mouse #3	mouse #4	mouse #5	mouse #6	mouse #7	CL: Contralateral
CL	39.6078	49.0196	52.8105	55.9477	61.8301	59.8693	73.8562	IL: Ipsilateral (CCA-ligated)
IL	32.053	34.3046	39.0728	42.2517	43.3113	45.0331	67.5497
DRH-123 Fluorescence @ 5h	mouse #1	mouse #2	mouse #3	mouse #4	mouse #5	mouse #6	mouse #7
UN	57.1053	60.2632	61.0526	63.1579	68.1579	71.1842	73.2895
	mouse #1	mouse #2	mouse #3	mouse #4	mouse #5	mouse #6	mouse #7
CL	48.5526	53.1579	58.0263	63.1579	64.8684	66.9737	69.2105
IL	20	23.9474	31.1842	33.9474	35.9211	37.5	45
