# Supplementary material for: Dual-modal metabolic analysis reveals hypothermia-reversible uncoupling of oxidative phosphorylation in neonatal brain hypoxia-ischemia
Source: eLife. 2025 Dec 29;13:RP100129. doi: 10.7554/eLife.100129 (PMC12747520; doi:10.7554/eLife.100129)
Supplement: Figure 3—source data 1. [file elife-100129-fig3-data1.xlsx]

## Sheet: Figure 3B
CBF		mouse #1		mouse #2		mouse #3		mouse #4		mouse #5		Unit: mL/100g/min
		CL	IL	CL	IL	CL	IL	CL	IL	CL	IL	CL: Contralateral
CCA-ligation		23.584	21.414	25.798	26.351	22.356	25.949	28.591	24.355	30.591	24.996	IL: Ipsilateral (CCA-ligated)
During HI		27.313	18.453	26.86	32.224	31.151	38.503	30.261	25.768	40.587	25.703
Post-HI (min)	0–40	26.441	23.541	33.471	30.511	40.774	37.421	37.651	29.305	41.957	28.654
	40–80	33.217	24.336	36.637	31.261			38.874	32.594	40.569	27.417
	80–120	37.601	24.031	39.653	32.309			35.967	31.171	42.667	27.857
