# Supplementary material for: Dual-modal metabolic analysis reveals hypothermia-reversible uncoupling of oxidative phosphorylation in neonatal brain hypoxia-ischemia
Source: eLife. 2025 Dec 29;13:RP100129. doi: 10.7554/eLife.100129 (PMC12747520; doi:10.7554/eLife.100129)
Supplement: Figure 3—source data 2. [file elife-100129-fig3-data2.xlsx]

## Sheet: Figure 3C
OEF		mouse #1		mouse #2		mouse #3		mouse #4		mouse #5		Unit: N/A
		CL	IL	CL	IL	CL	IL	CL	IL	CL	IL	CL: Contralateral
CCA-ligation		0.213	0.226	0.254	0.268	0.221	0.274	0.24	0.248	0.241	0.244	IL: Ipsilateral (CCA-ligated)
During HI		0.321	0.241	0.487	0.242	0.432	0.256	0.466	0.373	0.376	0.291
Post-HI (min)	0–40	0.197	0.224	0.224	0.244	0.215	0.317	0.261	0.251	0.193	0.204
	40–80	0.177	0.215	0.214	0.237			0.285	0.246	0.181	0.196
	80–120	0.161	0.206	0.191	0.24			0.281	0.246	0.197	0.188
