# Supplementary material for: Dual-modal metabolic analysis reveals hypothermia-reversible uncoupling of oxidative phosphorylation in neonatal brain hypoxia-ischemia
Source: eLife. 2025 Dec 29;13:RP100129. doi: 10.7554/eLife.100129 (PMC12747520; doi:10.7554/eLife.100129)
Supplement: Figure 3—source data 3. [file elife-100129-fig3-data3.xlsx]

## Sheet: Figure 3D
CMRO2		mouse #1		mouse #2		mouse #3		mouse #4		mouse #5		Unit: mL/100g/min
		CL	IL	CL	IL	CL	IL	CL	IL	CL	IL	CL: Contralateral
CCA-ligation		1.296	1.125	1.432	1.217	1.123	1.613	2.286	2.358	1.679	1.412	IL: Ipsilateral (CCA-ligated)
During HI		1.608	0.803	2.426	0.572	2.469	0.523	3.084	1.738	2.735	0.873
Post-HI (min)	0–40	1.273	1.257	1.575	1.781	1.441	0.831	2.145	1.854	1.741	0.868
	40–80	1.815	1.172	1.502	1.526			1.911	1.881	1.875	0.937
	80–120	1.336	1.101	1.435	1.312			2.087	2.032	1.634	1.144
