# Supplementary material for: Dual-modal metabolic analysis reveals hypothermia-reversible uncoupling of oxidative phosphorylation in neonatal brain hypoxia-ischemia
Source: eLife. 2025 Dec 29;13:RP100129. doi: 10.7554/eLife.100129 (PMC12747520; doi:10.7554/eLife.100129)
Supplement: Figure 3—source data 4. [file elife-100129-fig3-data4.xlsx]

## Sheet: Figure 3E
CBF @ 37°C		mouse #1	mouse #2	mouse #3	mouse #4	mouse #5	Unit: mL/100g/min
CCA-ligation		29.065	21.788	30.329	16.734	20.453	37°C: Normothermia
During HI		25.903	23.485	30.221	21.184	29.378	32°C: Hypothermia
Post-HI (min)	0–40	26.212	23.661	28.729	32.423	30.506
	40–80	21.57	25.483	32.565	34.522	34.796
	80–120		27.223	34.442	26.584	33.665
CBF @ 32°C		mouse #1	mouse #2	mouse #3	mouse #4	mouse #5
CCA-ligation		21.414	26.351	25.949	24.355	24.996
During HI		18.453	32.224	38.503	25.768	25.703
Post-HI (min)	0–40	23.541	30.511	37.421	29.305	28.654
	40–80	24.336	31.261		32.594	27.417
	80–120	24.031	32.309		31.171	27.857
OEF @ 37°C		mouse #1	mouse #2	mouse #3	mouse #4	mouse #5	Unit: N/A
CCA-ligation		0.224	0.248	0.303	0.36	0.34
During HI		0.13	0.374	0.255	0.245	0.246
Post-HI (min)	0–40	0.199	0.556	0.34	0.365	0.455
	40–80	0.275	0.475	0.333	0.263	0.44
	80–120		0.449	0.338	0.278	0.296
OEF @ 32°C		mouse #1	mouse #2	mouse #3	mouse #4	mouse #5
CCA-ligation		0.226	0.268	0.274	0.248	0.244
During HI		0.241	0.242	0.256	0.373	0.291
Post-HI (min)	0–40	0.224	0.244	0.317	0.251	0.204
	40–80	0.215	0.237		0.246	0.196
	80–120	0.206	0.24		0.246	0.188
CMRO2 @ 37°C		mouse #1	mouse #2	mouse #3	mouse #4	mouse #5	Unit: mL/100g/min
CCA-ligation		1.464	1.239	2.148	1.386	1.582
During HI		0.506	0.758	1.043	0.724	0.881
Post-HI (min)	0–40	1.121	2.65	2.205	2.565	2.935
	40–80	1.288	2.588	2.532	1.985	3.319
	80–120		2.683	2.699	1.681	2.476
CMRO2 @ 32°C		mouse #1	mouse #2	mouse #3	mouse #4	mouse #5
CCA-ligation		1.125	1.217	1.613	2.358	1.412
During HI		0.803	0.572	0.523	1.738	0.873
Post-HI (min)	0–40	1.257	1.781	0.831	1.854	0.868
	40–80	1.172	1.526		1.881	0.937
	80–120	1.101	1.312		2.032	1.144
