# Supplementary material for: Dual-modal metabolic analysis reveals hypothermia-reversible uncoupling of oxidative phosphorylation in neonatal brain hypoxia-ischemia
Source: eLife. 2025 Dec 29;13:RP100129. doi: 10.7554/eLife.100129 (PMC12747520; doi:10.7554/eLife.100129)
Supplement: Figure 3—source data 5. [file elife-100129-fig3-data5.xlsx]

## Sheet: Figure 3F
OCR @ 37°C	mouse #1	mouse #2	mouse #3	mouse #4	mouse #5	Unit: nmol/min/mg
CL	130.25	145.1	121.1	116		CL: Contralateral
IL	50	31	47	107		IL: Ipsilateral (CCA-ligated)
OCR @ 32°C	mouse #1	mouse #2	mouse #3	mouse #4	mouse #5
CL	145	109	134	137	118
IL	131	99	115	70	101
