# Supplementary material for: Dual-modal metabolic analysis reveals hypothermia-reversible uncoupling of oxidative phosphorylation in neonatal brain hypoxia-ischemia
Source: eLife. 2025 Dec 29;13:RP100129. doi: 10.7554/eLife.100129 (PMC12747520; doi:10.7554/eLife.100129)
Supplement: Figure 3—source data 6. [file elife-100129-fig3-data6.xlsx]

## Sheet: Figure 3G
MitoSox Red @ 37°C	mouse #1	mouse #2	mouse #3	mouse #4	mouse #5	Unit: a.u.
CL	101	92	117	116		CL: Contralateral
IL	205	197	224	133		IL: Ipsilateral (CCA-ligated)
MitoSox Red @ 32°C	mouse #1	mouse #2	mouse #3	mouse #4	mouse #5
CL	107	109	121	119	101
IL	118	117	137	183	116
