# Supplementary material for: Dual-modal metabolic analysis reveals hypothermia-reversible uncoupling of oxidative phosphorylation in neonatal brain hypoxia-ischemia
Source: eLife. 2025 Dec 29;13:RP100129. doi: 10.7554/eLife.100129 (PMC12747520; doi:10.7554/eLife.100129)
Supplement: Figure 3—source data 7. [file elife-100129-fig3-data7.xlsx]

## Sheet: Figure 3H
H2O2 Emission Rate @ 37°C	mouse #1	mouse #2	mouse #3	mouse #4	mouse #5	Unit: pmol/mg/min
CL	478	501	529	479		CL: Contralateral
IL	411	230	244	210		IL: Ipsilateral (CCA-ligated)
H2O2 Emission Rate @ 32°C	mouse #1	mouse #2	mouse #3	mouse #4	mouse #5
CL	461	441	413	501	514
IL	437	397	401	314	486
