# Supplementary material for: Dual-modal metabolic analysis reveals hypothermia-reversible uncoupling of oxidative phosphorylation in neonatal brain hypoxia-ischemia
Source: eLife. 2025 Dec 29;13:RP100129. doi: 10.7554/eLife.100129 (PMC12747520; doi:10.7554/eLife.100129)
Supplement: Figure 3—source data 8. [file elife-100129-fig3-data8.xlsx]

## Sheet: Figure 3I
DRH-123 Fluorescence @ 37°C	mouse #1	mouse #2	mouse #3	mouse #4	mouse #5	Unit: a.u.
CL	62	67.2	49.2	65		CL: Contralateral
IL	27	21	23	57		IL: Ipsilateral (CCA-ligated)
DRH-123 Fluorescence @ 32°C	mouse #1	mouse #2	mouse #3	mouse #4	mouse #5
CL	57.9	61	64.8	47	67.2
IL	51	54	57	39	65
