# Supplementary material for: Dual-modal metabolic analysis reveals hypothermia-reversible uncoupling of oxidative phosphorylation in neonatal brain hypoxia-ischemia
Source: eLife. 2025 Dec 29;13:RP100129. doi: 10.7554/eLife.100129 (PMC12747520; doi:10.7554/eLife.100129)
Supplement: Figure 3—source data 9. [file elife-100129-fig3-data9.xlsx]

## Sheet: Figure 3J
ATP Level @ 37°C	mouse #1	mouse #2	mouse #3	Unit: mmol/g
CL	0.629032	0.851613	1.02903	CL: Contralateral
IL	0.319672	0.351639	0.322131	IL: Ipsilateral (CCA-ligated)
ATP Level @ 32°C	mouse #1	mouse #2	mouse #3
CL	0.733065	0.86129	1.05968
IL	0.360484	0.672581	0.895161
