# Supplementary material for: Dual-modal metabolic analysis reveals hypothermia-reversible uncoupling of oxidative phosphorylation in neonatal brain hypoxia-ischemia
Source: eLife. 2025 Dec 29;13:RP100129. doi: 10.7554/eLife.100129 (PMC12747520; doi:10.7554/eLife.100129)
Supplement: Figure 4—figure supplement 1—source data 1. [file elife-100129-fig4-figsupp1-data1.xlsx]

## Sheet: Figure S3
Normothermia @ 37°C	NAA		Cr/PCr		Cho		Glx		NAA/Glx		CL: Contralateral
	CL	IL	CL	IL	CL	IL	CL	IL	CL	IL	IL: Ipsilateral (CCA-ligated)
mouse #1	2.1336	1.3257	1.3993	0.9578	4.8879	2.7691	1.9968	1.9675	1.08442	0.769235
mouse #2	1.8415	1.4557	1.082	0.92	2.8194	2.2456	1.7234	1.6229	1.1347	0.962065
mouse #3	1.9605	0.6297	1.4816	0.3718	5.9355	1.3581	2.018	1.0985	1.78471	0.323587
mouse #4	1.8467	0.577	1.3024	0.3781	6.2828	1.1126	1.946	0.9635	1.91666	0.31838
mouse #5	1.4245	0.3797	1.0295	0.2118	4.1033	0.6694	1.8123	0.8017	1.77685	0.215616
Hypothermia @ 32°C	NAA		Cr/PCr		Cho		Glx		NAA/Glx
	CL	IL	CL	IL	CL	IL	CL	IL	CL	IL
mouse #1	1.6888	1.5914	0.9358	1.0243	2.5154	2.8317	1.5131	1.6748	1.08442	0.788603
mouse #2	1.5084	0.979	1.2458	0.6897	4.0786	2.3864	1.761	1.216	1.1347	0.601647
mouse #3	1.5881	1.0625	1.0104	0.7458	4.6324	2.8768	1.6272	1.5641	1.78471	0.679304
