# Supplementary material for: Dual-modal metabolic analysis reveals hypothermia-reversible uncoupling of oxidative phosphorylation in neonatal brain hypoxia-ischemia
Source: eLife. 2025 Dec 29;13:RP100129. doi: 10.7554/eLife.100129 (PMC12747520; doi:10.7554/eLife.100129)
Supplement: Figure 4—source data 1. [file elife-100129-fig4-data1.xlsx]

## Sheet: Figure 4D
Infarct Volume	37°C		Infarct Volume	32°C	Unit: mm3
mouse #1	52.771		mouse #1	22.126
mouse #2	67.694		mouse #2	4.517
mouse #3	60.814		mouse #3	4.261
mouse #4	48.318		mouse #4	6.092
mouse #5	10.825		mouse #5	7.917
mouse #6	15.44		mouse #6	7.497
mouse #7	57.105
mouse #8	4.507
mouse #9	72.393
mouse #10	62.632
