# Supplementary material for: Dual-modal metabolic analysis reveals hypothermia-reversible uncoupling of oxidative phosphorylation in neonatal brain hypoxia-ischemia
Source: eLife. 2025 Dec 29;13:RP100129. doi: 10.7554/eLife.100129 (PMC12747520; doi:10.7554/eLife.100129)
Supplement: Figure 4—source data 2. [file elife-100129-fig4-data2.xlsx]

## Sheet: Figure 4E
CBF @ 37°C	mouse #1	mouse #2	mouse #3	mouse #4	Unit: mL/100g/min
CL	63.8694	61.3123	45.4296	44.1634	CL: Contralateral
IL	34.4782	25.643	38.1929	35.5941	IL: Ipsilateral (CCA-ligated)
CBF @ 32°C	mouse #1	mouse #2	mouse #3	mouse #4
CL	51.2906	56.5675	36.6208	60.8934
IL	39.4854	41.1255	32.2551	51.6343
