# Supplementary material for: Dual-modal metabolic analysis reveals hypothermia-reversible uncoupling of oxidative phosphorylation in neonatal brain hypoxia-ischemia
Source: eLife. 2025 Dec 29;13:RP100129. doi: 10.7554/eLife.100129 (PMC12747520; doi:10.7554/eLife.100129)
Supplement: Figure 4—source data 3. [file elife-100129-fig4-data3.xlsx]

## Sheet: Figure 4F
OFE @ 37°C	mouse #1	mouse #2	mouse #3	mouse #4	Unit: N/A
CL	0.280531	0.146698	0.120417	0.239741	CL: Contralateral
IL	0.098184	0.032622	0.025529	0.0213479	IL: Ipsilateral (CCA-ligated)
OEF @ 32°C	mouse #1	mouse #2	mouse #3	mouse #4
CL	0.271291	0.161113	0.138104	0.290955
IL	0.290178	0.189744	0.194598	0.24322
