# Supplementary material for: Dual-modal metabolic analysis reveals hypothermia-reversible uncoupling of oxidative phosphorylation in neonatal brain hypoxia-ischemia
Source: eLife. 2025 Dec 29;13:RP100129. doi: 10.7554/eLife.100129 (PMC12747520; doi:10.7554/eLife.100129)
Supplement: Figure 4—source data 4. [file elife-100129-fig4-data4.xlsx]

## Sheet: Figure 4G
CMRO2 @ 37°C	mouse #1	mouse #2	mouse #3	mouse #4	Unit: mL/100g/min
CL	4.20306	2.15769	1.29882	2.46168	CL: Contralateral
IL	0.770663	0.201844	0.236695	0.184075	IL: Ipsilateral (CCA-ligated)
CMRO2 @ 32°C	mouse #1	mouse #2	mouse #3	mouse #4
CL	3.16012	1.97332	1.11621	4.01858
IL	2.63906	1.63497	1.35955	2.84268
