# Supplementary material for: Dual-modal metabolic analysis reveals hypothermia-reversible uncoupling of oxidative phosphorylation in neonatal brain hypoxia-ischemia
Source: eLife. 2025 Dec 29;13:RP100129. doi: 10.7554/eLife.100129 (PMC12747520; doi:10.7554/eLife.100129)
Supplement: Figure 4—source data 5. [file elife-100129-fig4-data5.xlsx]

## Sheet: Figure 4H
NMR analysis @ 37°C
Contralateral		Ipsilaateral
x	y	x	y
5	400	5	236
4.99962	400	4.99962	235
4.99923	400	4.99923	235
4.99885	400	4.99885	235
4.99847	400	4.99847	235
4.99808	402	4.99808	236
4.9977	403	4.9977	235
4.99731	405	4.99731	234
4.99693	404	4.99693	235
4.99655	403	4.99655	237
4.99616	402	4.99616	240
4.99578	401	4.99578	241
4.9954	399	4.9954	242
4.99501	401	4.99501	244
4.99463	402	4.99463	245
4.99424	402	4.99424	246
4.99386	404	4.99386	247
4.99348	403	4.99348	246
4.99309	402	4.99309	246
4.99271	398	4.99271	249
4.99233	397	4.99233	249
4.99194	394	4.99194	253
4.99156	394	4.99156	254
4.99118	394	4.99118	254
4.99079	396	4.99079	249
4.99041	397	4.99041	247
4.99002	398	4.99002	245
4.98964	401	4.98964	239
4.98926	402	4.98926	238
4.98887	405	4.98887	234
4.98849	408	4.98849	232
4.98811	409	4.98811	231
4.98772	410	4.98772	231
4.98734	410	4.98734	231
4.98695	409	4.98695	231
4.98657	408	4.98657	229
4.98619	407	4.98619	228
4.9858	406	4.9858	227
4.98542	406	4.98542	224
4.98504	406	4.98504	223
4.98465	406	4.98465	223
4.98427	407	4.98427	224
4.98389	409	4.98389	224
4.9835	409	4.9835	225
4.98312	408	4.98312	226
4.98273	407	4.98273	226
4.98235	406	4.98235	226
4.98197	405	4.98197	224
4.98158	404	4.98158	222
4.9812	403	4.9812	221
4.98082	402	4.98082	222
4.98043	401	4.98043	222
4.98005	401	4.98005	223
4.97966	400	4.97966	223
4.97928	400	4.97928	223
4.9789	400	4.9789	223
4.97851	402	4.97851	223
4.97813	409	4.97813	220
4.97775	410	4.97775	220
4.97736	415	4.97736	224
4.97698	417	4.97698	228
4.9766	418	4.9766	228
4.97621	419	4.97621	224
4.97583	419	4.97583	223
4.97544	419	4.97544	222
4.97506	421	4.97506	223
4.97468	421	4.97468	224
4.97429	422	4.97429	225
4.97391	424	4.97391	226
4.97353	424	4.97353	227
4.97314	427	4.97314	233
4.97276	429	4.97276	236
4.97237	430	4.97237	238
4.97199	435	4.97199	245
4.97161	436	4.97161	246
4.97122	437	4.97122	250
4.97084	439	4.97084	249
4.97046	439	4.97046	249
4.97007	440	4.97007	249
4.96969	433	4.96969	248
4.9693	432	4.9693	248
4.96892	423	4.96892	248
4.96854	421	4.96854	250
4.96815	420	4.96815	251
4.96777	420	4.96777	254
4.96739	421	4.96739	255
4.967	421	4.967	255
4.96662	420	4.96662	248
4.96624	419	4.96624	247
4.96585	417	4.96585	245
4.96547	418	4.96547	247
4.96508	419	4.96508	248
4.9647	420	4.9647	251
4.96432	418	4.96432	253
4.96393	417	4.96393	256
4.96355	421	4.96355	267
4.96317	421	4.96317	269
4.96278	425	4.96278	271
4.9624	429	4.9624	277
4.96201	431	4.96201	278
4.96163	440	4.96163	281
4.96125	441	4.96125	277
4.96086	442	4.96086	276
4.96048	445	4.96048	270
4.9601	445	4.9601	269
4.95971	444	4.95971	268
4.95933	440	4.95933	265
4.95895	439	4.95895	264
4.95856	438	4.95856	264
4.95818	439	4.95818	266
4.95779	439	4.95779	267
4.95741	439	4.95741	273
4.95703	440	4.95703	273
4.95664	442	4.95664	272
4.95626	442	4.95626	270
4.95588	442	4.95588	269
4.95549	440	4.95549	266
4.95511	443	4.95511	263
4.95472	445	4.95472	262
4.95434	450	4.95434	261
4.95396	451	4.95396	260
4.95357	452	4.95357	259
4.95319	455	4.95319	259
4.95281	456	4.95281	259
4.95242	457	4.95242	260
4.95204	461	4.95204	268
4.95166	463	4.95166	270
4.95127	468	4.95127	275
4.95089	474	4.95089	278
4.9505	475	4.9505	280
4.95012	479	4.95012	286
4.94974	479	4.94974	288
4.94935	480	4.94935	288
4.94897	479	4.94897	292
4.94859	478	4.94859	292
4.9482	477	4.9482	294
4.94782	478	4.94782	295
4.94743	479	4.94743	295
4.94705	483	4.94705	297
4.94667	484	4.94667	297
4.94628	485	4.94628	297
4.9459	491	4.9459	296
4.94552	492	4.94552	296
4.94513	494	4.94513	294
4.94475	502	4.94475	298
4.94437	503	4.94437	299
4.94398	508	4.94398	303
4.9436	513	4.9436	311
4.94321	515	4.94321	313
4.94283	520	4.94283	320
4.94245	522	4.94245	322
4.94206	523	4.94206	323
4.94168	531	4.94168	330
4.9413	534	4.9413	331
4.94091	536	4.94091	332
4.94053	542	4.94053	339
4.94014	543	4.94014	340
4.93976	551	4.93976	342
4.93938	556	4.93938	342
4.93899	558	4.93899	342
4.93861	566	4.93861	340
4.93823	568	4.93823	339
4.93784	570	4.93784	338
4.93746	578	4.93746	332
4.93708	580	4.93708	331
4.93669	581	4.93669	329
4.93631	587	4.93631	324
4.93592	588	4.93592	324
4.93554	591	4.93554	321
4.93516	592	4.93516	324
4.93477	594	4.93477	324
4.93439	594	4.93439	327
4.93401	593	4.93401	328
4.93362	593	4.93362	329
4.93324	599	4.93324	334
4.93285	600	4.93285	336
4.93247	606	4.93247	338
4.93209	611	4.93209	331
4.9317	612	4.9317	330
4.93132	614	4.93132	323
4.93094	615	4.93094	321
4.93055	616	4.93055	321
4.93017	617	4.93017	315
4.92979	617	4.92979	315
4.9294	616	4.9294	317
4.92902	612	4.92902	323
4.92863	611	4.92863	324
4.92825	612	4.92825	333
4.92787	613	4.92787	337
4.92748	614	4.92748	338
4.9271	614	4.9271	342
4.92672	616	4.92672	343
4.92633	616	4.92633	344
4.92595	618	4.92595	351
4.92556	618	4.92556	351
4.92518	621	4.92518	355
4.9248	627	4.9248	353
4.92441	629	4.92441	353
4.92403	633	4.92403	351
4.92365	634	4.92365	351
4.92326	635	4.92326	352
4.92288	635	4.92288	359
4.9225	635	4.9225	360
4.92211	634	4.92211	363
4.92173	631	4.92173	376
4.92134	630	4.92134	378
4.92096	627	4.92096	385
4.92058	626	4.92058	392
4.92019	625	4.92019	395
4.91981	628	4.91981	404
4.91943	630	4.91943	406
4.91904	631	4.91904	408
4.91866	636	4.91866	414
4.91827	637	4.91827	416
4.91789	640	4.91789	417
4.91751	646	4.91751	413
4.91712	647	4.91712	412
4.91674	649	4.91674	410
4.91636	649	4.91636	410
4.91597	649	4.91597	410
4.91559	649	4.91559	410
4.9152	650	4.9152	410
4.91482	649	4.91482	410
4.91444	648	4.91444	403
4.91405	647	4.91405	403
4.91367	645	4.91367	398
4.91329	642	4.91329	391
4.9129	641	4.9129	388
4.91252	640	4.91252	387
4.91214	640	4.91214	388
4.91175	639	4.91175	389
4.91137	638	4.91137	389
4.91098	638	4.91098	389
4.9106	635	4.9106	388
4.91022	635	4.91022	386
4.90983	634	4.90983	386
4.90945	634	4.90945	384
4.90907	636	4.90907	387
4.90868	636	4.90868	387
4.9083	641	4.9083	387
4.90791	640	4.90791	388
4.90753	638	4.90753	389
4.90715	635	4.90715	389
4.90676	635	4.90676	389
4.90638	632	4.90638	390
4.906	633	4.906	389
4.90561	634	4.90561	390
4.90523	638	4.90523	394
4.90485	639	4.90485	395
4.90446	640	4.90446	395
4.90408	646	4.90408	400
4.90369	648	4.90369	401
4.90331	650	4.90331	401
4.90293	659	4.90293	406
4.90254	661	4.90254	406
4.90216	669	4.90216	411
4.90178	676	4.90178	414
4.90139	679	4.90139	417
4.90101	693	4.90101	431
4.90062	697	4.90062	435
4.90024	700	4.90024	438
4.89986	719	4.89986	452
4.89947	723	4.89947	454
4.89909	729	4.89909	457
4.89871	746	4.89871	467
4.89832	749	4.89832	469
4.89794	758	4.89794	475
4.89756	760	4.89756	477
4.89717	762	4.89717	479
4.89679	758	4.89679	484
4.8964	757	4.8964	486
4.89602	756	4.89602	488
4.89564	746	4.89564	496
4.89525	743	4.89525	498
4.89487	726	4.89487	501
4.89449	710	4.89449	501
4.8941	704	4.8941	501
4.89372	672	4.89372	501
4.89333	663	4.89333	499
4.89295	656	4.89295	496
4.89257	630	4.89257	479
4.89218	625	4.89218	475
4.8918	620	4.8918	470
4.89142	607	4.89142	450
4.89103	605	4.89103	446
4.89065	596	4.89065	429
4.89027	592	4.89027	419
4.88988	590	4.88988	415
4.8895	578	4.8895	395
4.88911	575	4.88911	391
4.88873	573	4.88873	388
4.88835	569	4.88835	379
4.88796	568	4.88796	377
4.88758	565	4.88758	372
4.8872	558	4.8872	364
4.88681	557	4.88681	363
4.88643	551	4.88643	360
4.88604	555	4.88604	359
4.88566	557	4.88566	359
4.88528	569	4.88528	358
4.88489	571	4.88489	359
4.88451	575	4.88451	360
4.88413	591	4.88413	363
4.88374	595	4.88374	365
4.88336	608	4.88336	368
4.88298	615	4.88298	372
4.88259	618	4.88259	373
4.88221	630	4.88221	378
4.88182	632	4.88182	380
4.88144	635	4.88144	381
4.88106	656	4.88106	389
4.88067	662	4.88067	392
4.88029	672	4.88029	395
4.87991	701	4.87991	404
4.87952	708	4.87952	406
4.87914	744	4.87914	422
4.87875	756	4.87875	429
4.87837	767	4.87837	435
4.87799	822	4.87799	459
4.8776	835	4.8776	465
4.87722	849	4.87722	470
4.87684	908	4.87684	489
4.87645	922	4.87645	492
4.87607	963	4.87607	501
4.87569	1003	4.87569	516
4.8753	1017	4.8753	520
4.87492	1078	4.87492	538
4.87453	1087	4.87453	542
4.87415	1089	4.87415	547
4.87377	1103	4.87377	565
4.87338	1103	4.87338	568
4.873	1099	4.873	574
4.87262	1064	4.87262	597
4.87223	1052	4.87223	600
4.87185	976	4.87185	608
4.87146	946	4.87146	611
4.87108	928	4.87108	611
4.8707	844	4.8707	615
4.87031	826	4.87031	615
4.86993	808	4.86993	614
4.86955	743	4.86955	585
4.86916	728	4.86916	576
4.86878	709	4.86878	565
4.8684	667	4.8684	521
4.86801	660	4.86801	511
4.86763	635	4.86763	463
4.86724	628	4.86724	449
4.86686	622	4.86686	439
4.86648	598	4.86648	406
4.86609	594	4.86609	401
4.86571	591	4.86571	396
4.86533	577	4.86533	379
4.86494	573	4.86494	374
4.86456	565	4.86456	367
4.86417	558	4.86417	357
4.86379	556	4.86379	355
4.86341	551	4.86341	340
4.86302	551	4.86302	337
4.86264	552	4.86264	334
4.86226	555	4.86226	324
4.86187	557	4.86187	322
4.86149	560	4.86149	321
4.86111	572	4.86111	318
4.86072	574	4.86072	318
4.86034	587	4.86034	316
4.85995	593	4.85995	316
4.85957	599	4.85957	316
4.85919	627	4.85919	321
4.8588	633	4.8588	324
4.85842	640	4.85842	326
4.85804	669	4.85804	340
4.85765	675	4.85765	342
4.85727	696	4.85727	346
4.85688	720	4.85688	354
4.8565	728	4.8565	356
4.85612	775	4.85612	371
4.85573	791	4.85573	376
4.85535	806	4.85535	381
4.85497	867	4.85497	399
4.85458	881	4.85458	403
4.8542	899	4.8542	408
4.85381	958	4.85381	426
4.85343	970	4.85343	430
4.85305	1017	4.85305	446
4.85266	1036	4.85266	455
4.85228	1040	4.85228	459
4.8519	1054	4.8519	488
4.85151	1054	4.85151	496
4.85113	1054	4.85113	505
4.85075	1033	4.85075	543
4.85036	1029	4.85036	551
4.84998	1012	4.84998	564
4.84959	949	4.84959	594
4.84921	928	4.84921	596
4.84883	837	4.84883	603
4.84844	812	4.84844	604
4.84806	793	4.84806	602
4.84768	719	4.84768	591
4.84729	705	4.84729	586
4.84691	691	4.84691	574
4.84652	638	4.84652	524
4.84614	627	4.84614	512
4.84576	606	4.84576	481
4.84537	584	4.84537	448
4.84499	579	4.84499	439
4.84461	557	4.84461	398
4.84422	551	4.84422	387
4.84384	547	4.84384	378
4.84346	526	4.84346	349
4.84307	522	4.84307	346
4.84269	517	4.84269	343
4.8423	502	4.8423	335
4.84192	498	4.84192	333
4.84154	489	4.84154	328
4.84115	486	4.84115	325
4.84077	485	4.84077	324
4.84039	482	4.84039	315
4.84	482	4.84	313
4.83962	480	4.83962	311
4.83923	480	4.83923	307
4.83885	480	4.83885	306
4.83847	481	4.83847	307
4.83808	484	4.83808	310
4.8377	485	4.8377	310
4.83732	491	4.83732	312
4.83693	492	4.83693	312
4.83655	493	4.83655	311
4.83617	496	4.83617	308
4.83578	497	4.83578	308
4.8354	498	4.8354	308
4.83501	503	4.83501	309
4.83463	504	4.83463	310
4.83425	507	4.83425	314
4.83386	510	4.83386	320
4.83348	511	4.83348	321
4.8331	520	4.8331	323
4.83271	523	4.83271	323
4.83233	527	4.83233	322
4.83194	546	4.83194	320
4.83156	549	4.83156	319
4.83118	555	4.83118	319
4.83079	568	4.83079	321
4.83041	569	4.83041	321
4.83003	578	4.83003	332
4.82964	580	4.82964	335
4.82926	580	4.82926	337
4.82888	578	4.82888	345
4.82849	577	4.82849	346
4.82811	575	4.82811	348
4.82772	557	4.82772	354
4.82734	553	4.82734	355
4.82696	543	4.82696	359
4.82657	533	4.82657	361
4.82619	530	4.82619	362
4.82581	514	4.82581	353
4.82542	510	4.82542	351
4.82504	506	4.82504	348
4.82465	489	4.82465	333
4.82427	485	4.82427	330
4.82389	481	4.82389	327
4.8235	463	4.8235	315
4.82312	459	4.82312	313
4.82274	449	4.82274	301
4.82235	447	4.82235	297
4.82197	446	4.82197	295
4.82159	442	4.82159	288
4.8212	442	4.8212	286
4.82082	443	4.82082	285
4.82043	441	4.82043	275
4.82005	440	4.82005	274
4.81967	438	4.81967	271
4.81928	434	4.81928	271
4.8189	433	4.8189	272
4.81852	431	4.81852	275
4.81813	431	4.81813	277
4.81775	432	4.81775	276
4.81736	439	4.81736	276
4.81698	440	4.81698	275
4.8166	442	4.8166	274
4.81621	445	4.81621	276
4.81583	445	4.81583	277
4.81545	447	4.81545	282
4.81506	445	4.81506	286
4.81468	445	4.81468	287
4.8143	444	4.8143	290
4.81391	443	4.81391	290
4.81353	444	4.81353	290
4.81314	444	4.81314	290
4.81276	444	4.81276	289
4.81238	444	4.81238	290
4.81199	444	4.81199	292
4.81161	444	4.81161	293
4.81123	443	4.81123	298
4.81084	444	4.81084	301
4.81046	444	4.81046	302
4.81007	451	4.81007	308
4.80969	453	4.80969	309
4.80931	454	4.80931	310
4.80892	459	4.80892	312
4.80854	460	4.80854	313
4.80816	459	4.80816	312
4.80777	458	4.80777	310
4.80739	457	4.80739	309
4.80701	456	4.80701	308
4.80662	456	4.80662	309
4.80624	456	4.80624	310
4.80585	453	4.80585	313
4.80547	456	4.80547	315
4.80509	460	4.80509	316
4.8047	473	4.8047	325
4.80432	475	4.80432	326
4.80394	485	4.80394	326
4.80355	487	4.80355	324
4.80317	488	4.80317	324
4.80278	491	4.80278	321
4.8024	491	4.8024	321
4.80202	491	4.80202	322
4.80163	491	4.80163	326
4.80125	490	4.80125	327
4.80087	492	4.80087	329
4.80048	495	4.80048	331
4.8001	496	4.8001	331
4.79971	506	4.79971	332
4.79933	510	4.79933	333
4.79895	512	4.79895	334
4.79856	525	4.79856	337
4.79818	527	4.79818	336
4.7978	530	4.7978	336
4.79741	541	4.79741	336
4.79703	543	4.79703	336
4.79665	549	4.79665	337
4.79626	553	4.79626	343
4.79588	554	4.79588	344
4.79549	557	4.79549	348
4.79511	558	4.79511	349
4.79473	558	4.79473	349
4.79434	562	4.79434	355
4.79396	563	4.79396	357
4.79358	566	4.79358	357
4.79319	578	4.79319	358
4.79281	581	4.79281	358
4.79242	594	4.79242	362
4.79204	598	4.79204	363
4.79166	601	4.79166	364
4.79127	610	4.79127	366
4.79089	611	4.79089	368
4.79051	614	4.79051	370
4.79012	623	4.79012	380
4.78974	625	4.78974	382
4.78936	639	4.78936	387
4.78897	650	4.78897	396
4.78859	655	4.78859	399
4.7882	679	4.7882	411
4.78782	685	4.78782	414
4.78744	691	4.78744	417
4.78705	711	4.78705	423
4.78667	714	4.78667	423
4.78629	718	4.78629	424
4.7859	727	4.7859	428
4.78552	728	4.78552	429
4.78513	741	4.78513	433
4.78475	745	4.78475	436
4.78437	749	4.78437	439
4.78398	766	4.78398	456
4.7836	770	4.7836	460
4.78322	774	4.78322	463
4.78283	785	4.78283	477
4.78245	787	4.78245	479
4.78207	790	4.78207	480
4.78168	795	4.78168	480
4.7813	796	4.7813	480
4.78091	808	4.78091	478
4.78053	813	4.78053	476
4.78015	817	4.78015	474
4.77976	838	4.77976	462
4.77938	842	4.77938	461
4.779	848	4.779	460
4.77861	868	4.77861	455
4.77823	872	4.77823	455
4.77784	885	4.77784	456
4.77746	896	4.77746	465
4.77708	898	4.77708	467
4.77669	906	4.77669	484
4.77631	907	4.77631	489
4.77593	908	4.77593	493
4.77554	899	4.77554	512
4.77516	898	4.77516	516
4.77478	890	4.77478	519
4.77439	867	4.77439	522
4.77401	862	4.77401	522
4.77362	839	4.77362	522
4.77324	832	4.77324	520
4.77286	827	4.77286	518
4.77247	806	4.77247	510
4.77209	801	4.77209	506
4.77171	796	4.77171	502
4.77132	775	4.77132	479
4.77094	771	4.77094	475
4.77055	764	4.77055	468
4.77017	758	4.77017	449
4.76979	757	4.76979	445
4.7694	753	4.7694	426
4.76902	756	4.76902	421
4.76864	757	4.76864	419
4.76825	760	4.76825	409
4.76787	761	4.76787	410
4.76749	763	4.76749	410
4.7671	759	4.7671	413
4.76672	758	4.76672	414
4.76633	746	4.76633	415
4.76595	740	4.76595	416
4.76557	737	4.76557	416
4.76518	718	4.76518	421
4.7648	714	4.7648	422
4.76442	711	4.76442	422
4.76403	699	4.76403	425
4.76365	696	4.76365	425
4.76326	689	4.76326	425
4.76288	678	4.76288	419
4.7625	675	4.7625	418
4.76211	667	4.76211	407
4.76173	666	4.76173	404
4.76135	665	4.76135	402
4.76096	665	4.76096	397
4.76058	665	4.76058	396
4.7602	666	4.7602	395
4.75981	671	4.75981	392
4.75943	672	4.75943	391
4.75904	676	4.75904	389
4.75866	679	4.75866	387
4.75828	680	4.75828	386
4.75789	682	4.75789	385
4.75751	682	4.75751	385
4.75713	681	4.75713	386
4.75674	675	4.75674	393
4.75636	673	4.75636	394
4.75597	672	4.75597	397
4.75559	665	4.75559	406
4.75521	664	4.75521	408
4.75482	664	4.75482	413
4.75444	665	4.75444	415
4.75406	665	4.75406	415
4.75367	664	4.75367	416
4.75329	664	4.75329	416
4.75291	663	4.75291	415
4.75252	656	4.75252	410
4.75214	654	4.75214	409
4.75175	647	4.75175	406
4.75137	641	4.75137	403
4.75099	638	4.75099	402
4.7506	626	4.7506	401
4.75022	624	4.75022	400
4.74984	621	4.74984	400
4.74945	620	4.74945	400
4.74907	620	4.74907	399
4.74868	619	4.74868	397
4.7483	615	4.7483	392
4.74792	614	4.74792	391
4.74753	612	4.74753	388
4.74715	612	4.74715	384
4.74677	612	4.74677	382
4.74638	615	4.74638	376
4.746	616	4.746	374
4.74561	618	4.74561	373
4.74523	629	4.74523	366
4.74485	631	4.74485	366
4.74446	635	4.74446	365
4.74408	647	4.74408	362
4.7437	650	4.7437	365
4.74331	659	4.74331	374
4.74293	662	4.74293	376
4.74255	664	4.74255	378
4.74216	675	4.74216	381
4.74178	678	4.74178	381
4.74139	681	4.74139	381
4.74101	700	4.74101	381
4.74063	705	4.74063	381
4.74024	730	4.74024	382
4.73986	743	4.73986	385
4.73948	748	4.73948	385
4.73909	776	4.73909	391
4.73871	782	4.73871	394
4.73832	787	4.73832	398
4.73794	807	4.73794	418
4.73756	811	4.73756	422
4.73717	818	4.73717	427
4.73679	836	4.73679	444
4.73641	841	4.73641	447
4.73602	860	4.73602	451
4.73564	866	4.73564	454
4.73526	871	4.73526	455
4.73487	896	4.73487	462
4.73449	900	4.73449	464
4.7341	901	4.7341	465
4.73372	908	4.73372	469
4.73334	910	4.73334	470
4.73295	910	4.73295	472
4.73257	902	4.73257	481
4.73219	899	4.73219	483
4.7318	885	4.7318	490
4.73142	881	4.73142	490
4.73103	878	4.73103	490
4.73065	861	4.73065	484
4.73027	857	4.73027	482
4.72988	851	4.72988	480
4.7295	831	4.7295	468
4.72912	827	4.72912	466
4.72873	811	4.72873	464
4.72835	805	4.72835	463
4.72797	802	4.72797	463
4.72758	786	4.72758	463
4.7272	782	4.7272	464
4.72681	778	4.72681	464
4.72643	760	4.72643	462
4.72605	754	4.72605	461
4.72566	747	4.72566	458
4.72528	723	4.72528	449
4.7249	717	4.7249	448
4.72451	696	4.72451	445
4.72413	691	4.72413	446
4.72374	688	4.72374	447
4.72336	673	4.72336	444
4.72298	670	4.72298	444
4.72259	667	4.72259	443
4.72221	664	4.72221	439
4.72183	665	4.72183	440
4.72144	665	4.72144	440
4.72106	669	4.72106	439
4.72068	671	4.72068	439
4.72029	679	4.72029	439
4.71991	681	4.71991	439
4.71952	684	4.71952	440
4.71914	695	4.71914	453
4.71876	698	4.71876	455
4.71837	702	4.71837	456
4.71799	723	4.71799	454
4.71761	729	4.71761	454
4.71722	756	4.71722	454
4.71684	764	4.71684	454
4.71645	770	4.71645	453
4.71607	794	4.71607	453
4.71569	798	4.71569	455
4.7153	802	4.7153	458
4.71492	818	4.71492	475
4.71454	821	4.71454	479
4.71415	827	4.71415	484
4.71377	835	4.71377	496
4.71339	836	4.71339	499
4.713	838	4.713	514
4.71262	839	4.71262	518
4.71223	839	4.71223	521
4.71185	839	4.71185	538
4.71147	838	4.71147	542
4.71108	837	4.71108	546
4.7107	835	4.7107	563
4.71032	834	4.71032	565
4.70993	833	4.70993	569
4.70955	832	4.70955	570
4.70916	831	4.70916	569
4.70878	831	4.70878	561
4.7084	832	4.7084	560
4.70801	833	4.70801	558
4.70763	833	4.70763	550
4.70725	832	4.70725	549
4.70686	828	4.70686	547
4.70648	824	4.70648	541
4.7061	823	4.7061	540
4.70571	822	4.70571	535
4.70533	821	4.70533	534
4.70494	821	4.70494	534
4.70456	824	4.70456	534
4.70418	826	4.70418	535
4.70379	829	4.70379	535
4.70341	842	4.70341	532
4.70303	846	4.70303	531
4.70264	858	4.70264	529
4.70226	869	4.70226	526
4.70187	873	4.70187	526
4.70149	893	4.70149	525
4.70111	900	4.70111	525
4.70072	906	4.70072	525
4.70034	938	4.70034	526
4.69996	945	4.69996	527
4.69957	954	4.69957	529
4.69919	987	4.69919	540
4.69881	995	4.69881	543
4.69842	1026	4.69842	550
4.69804	1037	4.69804	556
4.69765	1044	4.69765	559
4.69727	1070	4.69727	566
4.69689	1072	4.69689	568
4.6965	1073	4.6965	568
4.69612	1075	4.69612	570
4.69574	1073	4.69574	570
4.69535	1069	4.69535	570
4.69497	1058	4.69497	570
4.69458	1054	4.69458	571
4.6942	1032	4.6942	571
4.69382	1027	4.69382	571
4.69343	1022	4.69343	570
4.69305	1008	4.69305	572
4.69267	1006	4.69267	575
4.69228	1007	4.69228	578
4.6919	1008	4.6919	591
4.69152	1008	4.69152	594
4.69113	1011	4.69113	599
4.69075	1013	4.69075	606
4.69036	1016	4.69036	608
4.68998	1032	4.68998	611
4.6896	1037	4.6896	612
4.68921	1041	4.68921	613
4.68883	1061	4.68883	613
4.68845	1066	4.68845	613
4.68806	1075	4.68806	613
4.68768	1096	4.68768	612
4.68729	1101	4.68729	611
4.68691	1129	4.68691	605
4.68653	1137	4.68653	602
4.68614	1144	4.68614	602
4.68576	1178	4.68576	602
4.68538	1185	4.68538	604
4.68499	1194	4.68499	605
4.68461	1232	4.68461	601
4.68422	1241	4.68422	601
4.68384	1267	4.68384	598
4.68346	1293	4.68346	595
4.68307	1301	4.68307	596
4.68269	1338	4.68269	596
4.68231	1348	4.68231	596
4.68192	1356	4.68192	597
4.68154	1393	4.68154	603
4.68116	1402	4.68116	604
4.68077	1412	4.68077	606
4.68039	1443	4.68039	618
4.68	1449	4.68	622
4.67962	1473	4.67962	634
4.67924	1482	4.67924	641
4.67885	1487	4.67885	644
4.67847	1511	4.67847	654
4.67809	1517	4.67809	656
4.6777	1525	4.6777	660
4.67732	1553	4.67732	674
4.67693	1558	4.67693	677
4.67655	1568	4.67655	682
4.67617	1584	4.67617	699
4.67578	1585	4.67578	702
4.6754	1594	4.6754	718
4.67502	1594	4.67502	724
4.67463	1592	4.67463	727
4.67425	1566	4.67425	752
4.67387	1560	4.67387	759
4.67348	1549	4.67348	767
4.6731	1510	4.6731	799
4.67271	1502	4.67271	806
4.67233	1474	4.67233	826
4.67195	1462	4.67195	846
4.67156	1457	4.67156	852
4.67118	1432	4.67118	882
4.6708	1426	4.6708	889
4.67041	1426	4.67041	894
4.67003	1418	4.67003	908
4.66964	1419	4.66964	910
4.66926	1421	4.66926	912
4.66888	1432	4.66888	907
4.66849	1434	4.66849	905
4.66811	1463	4.66811	882
4.66773	1473	4.66773	870
4.66734	1483	4.66734	860
4.66696	1528	4.66696	811
4.66658	1538	4.66658	798
4.66619	1549	4.66619	786
4.66581	1598	4.66581	745
4.66542	1609	4.66542	740
4.66504	1640	4.66504	736
4.66466	1669	4.66466	723
4.66427	1676	4.66427	723
4.66389	1698	4.66389	726
4.66351	1701	4.66351	728
4.66312	1704	4.66312	730
4.66274	1694	4.66274	748
4.66235	1694	4.66235	751
4.66197	1690	4.66197	756
4.66159	1672	4.66159	777
4.6612	1667	4.6612	783
4.66082	1644	4.66082	802
4.66044	1636	4.66044	821
4.66005	1631	4.66005	828
4.65967	1603	4.65967	865
4.65929	1595	4.65929	876
4.6589	1584	4.6589	886
4.65852	1538	4.65852	932
4.65813	1527	4.65813	942
4.65775	1500	4.65775	956
4.65737	1454	4.65737	997
4.65698	1442	4.65698	1001
4.6566	1387	4.6566	1023
4.65622	1372	4.65622	1026
4.65583	1359	4.65583	1026
4.65545	1310	4.65545	1018
4.65506	1301	4.65506	1017
4.65468	1291	4.65468	1007
4.6543	1253	4.6543	945
4.65391	1245	4.65391	930
4.65353	1216	4.65353	900
4.65315	1203	4.65315	847
4.65276	1197	4.65276	835
4.65238	1172	4.65238	787
4.652	1166	4.652	774
4.65161	1160	4.65161	763
4.65123	1142	4.65123	719
4.65084	1141	4.65084	711
4.65046	1139	4.65046	701
4.65008	1136	4.65008	673
4.64969	1136	4.64969	667
4.64931	1140	4.64931	649
4.64893	1141	4.64893	641
4.64854	1143	4.64854	637
4.64816	1155	4.64816	641
4.64777	1158	4.64777	641
4.64739	1164	4.64739	641
4.64701	1195	4.64701	641
4.64662	1204	4.64662	640
4.64624	1231	4.64624	640
4.64586	1258	4.64586	639
4.64547	1267	4.64547	638
4.64509	1307	4.64509	637
4.64471	1318	4.64471	637
4.64432	1323	4.64432	638
4.64394	1344	4.64394	646
4.64355	1346	4.64355	648
4.64317	1349	4.64317	650
4.64279	1349	4.64279	666
4.6424	1344	4.6424	671
4.64202	1310	4.64202	688
4.64164	1299	4.64164	705
4.64125	1290	4.64125	710
4.64087	1240	4.64087	737
4.64048	1223	4.64048	744
4.6401	1208	4.6401	750
4.63972	1142	4.63972	775
4.63933	1128	4.63933	780
4.63895	1107	4.63895	787
4.63857	1071	4.63857	809
4.63818	1066	4.63818	812
4.6378	1050	4.6378	824
4.63742	1046	4.63742	827
4.63703	1042	4.63703	829
4.63665	1028	4.63665	821
4.63626	1026	4.63626	820
4.63588	1024	4.63588	814
4.6355	1015	4.6355	782
4.63511	1014	4.63511	775
4.63473	1011	4.63473	760
4.63435	1012	4.63435	730
4.63396	1013	4.63396	722
4.63358	1024	4.63358	689
4.63319	1027	4.63319	681
4.63281	1030	4.63281	675
4.63243	1048	4.63243	667
4.63204	1052	4.63204	666
4.63166	1059	4.63166	666
4.63128	1080	4.63128	666
4.63089	1085	4.63089	667
4.63051	1111	4.63051	671
4.63012	1121	4.63012	676
4.62974	1129	4.62974	678
4.62936	1168	4.62936	692
4.62897	1176	4.62897	696
4.62859	1187	4.62859	700
4.62821	1228	4.62821	712
4.62782	1238	4.62782	714
4.62744	1270	4.62744	717
4.62706	1304	4.62706	726
4.62667	1316	4.62667	729
4.62629	1384	4.62629	751
4.6259	1405	4.6259	759
4.62552	1426	4.62552	766
4.62514	1514	4.62514	795
4.62475	1534	4.62475	802
4.62437	1560	4.62437	810
4.62399	1658	4.62399	846
4.6236	1683	4.6236	855
4.62322	1803	4.62322	884
4.62283	1838	4.62283	913
4.62245	1867	4.62245	922
4.62207	2041	4.62207	993
4.62168	2091	4.62168	1015
4.6213	2147	4.6213	1039
4.62092	2381	4.62092	1143
4.62053	2432	4.62053	1166
4.62015	2527	4.62015	1195
4.61977	2752	4.61977	1314
4.61938	2812	4.61938	1344
4.619	3077	4.619	1472
4.61861	3148	4.61861	1520
4.61823	3187	4.61823	1549
4.61785	3331	4.61785	1656
4.61746	3348	4.61746	1666
4.61708	3349	4.61708	1669
4.6167	3301	4.6167	1693
4.61631	3294	4.61631	1686
4.61593	3159	4.61593	1668
4.61554	3100	4.61554	1602
4.61516	3043	4.61516	1572
4.61478	2766	4.61478	1392
4.61439	2698	4.61439	1331
4.61401	2627	4.61401	1285
4.61363	2378	4.61363	1095
4.61324	2324	4.61324	1057
4.61286	2261	4.61286	1019
4.61248	2064	4.61248	879
4.61209	2022	4.61209	849
4.61171	1857	4.61171	773
4.61132	1816	4.61132	738
4.61094	1782	4.61094	727
4.61056	1636	4.61056	678
4.61017	1600	4.61017	666
4.60979	1563	4.60979	655
4.60941	1436	4.60941	621
4.60902	1411	4.60902	616
4.60864	1348	4.60864	609
4.60825	1286	4.60825	588
4.60787	1265	4.60787	583
4.60749	1177	4.60749	565
4.6071	1157	4.6071	561
4.60672	1143	4.60672	559
4.60634	1078	4.60634	552
4.60595	1064	4.60595	551
4.60557	1045	4.60557	550
4.60519	997	4.60519	549
4.6048	989	4.6048	550
4.60442	959	4.60442	554
4.60403	947	4.60403	562
4.60365	940	4.60365	564
4.60327	907	4.60327	573
4.60288	900	4.60288	574
4.6025	893	4.6025	575
4.60212	866	4.60212	576
4.60173	860	4.60173	577
4.60135	852	4.60135	579
4.60096	829	4.60096	588
4.60058	826	4.60058	592
4.6002	811	4.6002	607
4.59981	806	4.59981	613
4.59943	803	4.59943	616
4.59905	785	4.59905	635
4.59866	781	4.59866	640
4.59828	775	4.59828	645
4.5979	751	4.5979	666
4.59751	745	4.59751	670
4.59713	731	4.59713	673
4.59674	725	4.59674	679
4.59636	723	4.59636	678
4.59598	719	4.59598	672
4.59559	718	4.59559	670
4.59521	717	4.59521	668
4.59483	715	4.59483	654
4.59444	714	4.59444	650
4.59406	713	4.59406	645
4.59367	703	4.59367	626
4.59329	703	4.59329	622
4.59291	699	4.59291	614
4.59252	700	4.59252	607
4.59214	699	4.59214	605
4.59176	704	4.59176	602
4.59137	706	4.59137	601
4.59099	709	4.59099	601
4.59061	722	4.59061	600
4.59022	724	4.59022	600
4.58984	730	4.58984	600
4.58945	736	4.58945	595
4.58907	737	4.58907	594
4.58869	739	4.58869	586
4.5883	739	4.5883	583
4.58792	739	4.58792	580
4.58754	734	4.58754	563
4.58715	732	4.58715	559
4.58677	728	4.58677	555
4.58638	705	4.58638	540
4.586	700	4.586	538
4.58562	674	4.58562	532
4.58523	664	4.58523	526
4.58485	658	4.58485	524
4.58447	634	4.58447	513
4.58408	631	4.58408	508
4.5837	627	4.5837	504
4.58332	619	4.58332	486
4.58293	617	4.58293	482
4.58255	615	4.58255	478
4.58216	612	4.58216	465
4.58178	611	4.58178	462
4.5814	610	4.5814	452
4.58101	609	4.58101	448
4.58063	610	4.58063	447
4.58025	615	4.58025	440
4.57986	617	4.57986	438
4.57948	620	4.57948	437
4.57909	635	4.57909	430
4.57871	638	4.57871	429
4.57833	649	4.57833	424
4.57794	659	4.57794	429
4.57756	662	4.57756	429
4.57718	670	4.57718	442
4.57679	672	4.57679	445
4.57641	674	4.57641	449
4.57602	674	4.57602	462
4.57564	672	4.57564	465
4.57526	670	4.57526	469
4.57487	660	4.57487	483
4.57449	658	4.57449	486
4.57411	641	4.57411	497
4.57372	634	4.57372	505
4.57334	630	4.57334	508
4.57296	614	4.57296	519
4.57257	610	4.57257	520
4.57219	607	4.57219	522
4.5718	593	4.5718	521
4.57142	591	4.57142	519
4.57104	584	4.57104	516
4.57065	575	4.57065	498
4.57027	574	4.57027	494
4.56989	568	4.56989	480
4.5695	567	4.5695	477
4.56912	568	4.56912	477
4.56873	571	4.56873	473
4.56835	572	4.56835	473
4.56797	574	4.56797	473
4.56758	574	4.56758	473
4.5672	573	4.5672	473
4.56682	572	4.56682	473
4.56643	574	4.56643	478
4.56605	576	4.56605	479
4.56567	590	4.56567	488
4.56528	594	4.56528	490
4.5649	598	4.5649	492
4.56451	617	4.56451	501
4.56413	620	4.56413	502
4.56375	627	4.56375	505
4.56336	647	4.56336	516
4.56298	652	4.56298	519
4.5626	669	4.5626	533
4.56221	674	4.56221	540
4.56183	678	4.56183	544
4.56144	692	4.56144	567
4.56106	694	4.56106	573
4.56068	695	4.56068	582
4.56029	702	4.56029	618
4.55991	703	4.55991	627
4.55953	700	4.55953	640
4.55914	684	4.55914	672
4.55876	680	4.55876	679
4.55838	656	4.55838	712
4.55799	649	4.55799	721
4.55761	644	4.55761	728
4.55722	620	4.55722	751
4.55684	615	4.55684	752
4.55646	609	4.55646	753
4.55607	591	4.55607	756
4.55569	589	4.55569	754
4.55531	582	4.55531	745
4.55492	580	4.55492	735
4.55454	579	4.55454	730
4.55415	584	4.55415	701
4.55377	585	4.55377	693
4.55339	587	4.55339	686
4.553	599	4.553	670
4.55262	601	4.55262	668
4.55224	607	4.55224	666
4.55185	616	4.55185	661
4.55147	618	4.55147	659
4.55109	631	4.55109	648
4.5507	635	4.5507	644
4.55032	639	4.55032	642
4.54993	656	4.54993	630
4.54955	660	4.54955	627
4.54917	662	4.54917	624
4.54878	673	4.54878	617
4.5484	673	4.5484	616
4.54802	666	4.54802	615
4.54763	664	4.54763	612
4.54725	663	4.54725	611
4.54686	644	4.54686	604
4.54648	637	4.54648	601
4.5461	631	4.5461	598
4.54571	604	4.54571	587
4.54533	599	4.54533	585
4.54495	590	4.54495	581
4.54456	568	4.54456	566
4.54418	563	4.54418	563
4.5438	540	4.5438	548
4.54341	534	4.54341	542
4.54303	529	4.54303	538
4.54264	510	4.54264	515
4.54226	507	4.54226	508
4.54188	503	4.54188	504
4.54149	492	4.54149	486
4.54111	489	4.54111	483
4.54073	487	4.54073	479
4.54034	487	4.54034	468
4.53996	489	4.53996	466
4.53957	488	4.53957	455
4.53919	486	4.53919	452
4.53881	486	4.53881	451
4.53842	481	4.53842	448
4.53804	480	4.53804	448
4.53766	478	4.53766	450
4.53727	479	4.53727	455
4.53689	480	4.53689	456
4.53651	480	4.53651	459
4.53612	480	4.53612	458
4.53574	480	4.53574	456
4.53535	484	4.53535	456
4.53497	485	4.53497	458
4.53459	487	4.53459	459
4.5342	489	4.5342	465
4.53382	490	4.53382	466
4.53344	491	4.53344	468
4.53305	491	4.53305	471
4.53267	491	4.53267	472
4.53228	490	4.53228	476
4.5319	488	4.5319	480
4.53152	488	4.53152	481
4.53113	487	4.53113	486
4.53075	488	4.53075	486
4.53037	488	4.53037	485
4.52998	488	4.52998	487
4.5296	488	4.5296	488
4.52922	485	4.52922	490
4.52883	482	4.52883	496
4.52845	481	4.52845	497
4.52806	477	4.52806	496
4.52768	477	4.52768	496
4.5273	477	4.5273	495
4.52691	477	4.52691	498
4.52653	476	4.52653	499
4.52615	474	4.52615	501
4.52576	475	4.52576	507
4.52538	476	4.52538	508
4.52499	482	4.52499	512
4.52461	483	4.52461	517
4.52423	485	4.52423	519
4.52384	488	4.52384	529
4.52346	489	4.52346	532
4.52308	489	4.52308	536
4.52269	486	4.52269	550
4.52231	486	4.52231	552
4.52193	484	4.52193	552
4.52154	484	4.52154	552
4.52116	484	4.52116	552
4.52077	490	4.52077	553
4.52039	491	4.52039	554
4.52001	493	4.52001	555
4.51962	499	4.51962	556
4.51924	500	4.51924	557
4.51886	502	4.51886	558
4.51847	507	4.51847	559
4.51809	509	4.51809	560
4.5177	514	4.5177	561
4.51732	518	4.51732	561
4.51694	520	4.51694	562
4.51655	525	4.51655	570
4.51617	527	4.51617	572
4.51579	528	4.51579	574
4.5154	533	4.5154	587
4.51502	535	4.51502	590
4.51463	540	4.51463	592
4.51425	546	4.51425	602
4.51387	548	4.51387	603
4.51348	557	4.51348	608
4.5131	558	4.5131	609
4.51272	558	4.51272	610
4.51233	557	4.51233	610
4.51195	556	4.51195	610
4.51157	555	4.51157	609
4.51118	551	4.51118	606
4.5108	550	4.5108	607
4.51041	542	4.51041	611
4.51003	537	4.51003	623
4.50965	536	4.50965	627
4.50926	527	4.50926	645
4.50888	524	4.50888	650
4.5085	521	4.5085	652
4.50811	506	4.50811	665
4.50773	506	4.50773	667
4.50734	505	4.50734	670
4.50696	504	4.50696	678
4.50658	504	4.50658	678
4.50619	501	4.50619	680
4.50581	500	4.50581	680
4.50543	499	4.50543	679
4.50504	499	4.50504	670
4.50466	501	4.50466	667
4.50428	502	4.50428	661
4.50389	505	4.50389	634
4.50351	506	4.50351	628
4.50312	509	4.50312	620
4.50274	513	4.50274	597
4.50236	514	4.50236	594
4.50197	522	4.50197	583
4.50159	522	4.50159	579
4.50121	522	4.50121	578
4.50082	523	4.50082	573
4.50044	523	4.50044	571
4.50005	523	4.50005	569
4.49967	527	4.49967	575
4.49929	527	4.49929	577
4.4989	532	4.4989	582
4.49852	536	4.49852	594
4.49814	539	4.49814	597
4.49775	551	4.49775	611
4.49737	554	4.49737	614
4.49699	556	4.49699	618
4.4966	558	4.4966	638
4.49622	558	4.49622	643
4.49583	557	4.49583	649
4.49545	555	4.49545	667
4.49507	554	4.49507	670
4.49468	550	4.49468	683
4.4943	548	4.4943	686
4.49392	547	4.49392	689
4.49353	539	4.49353	701
4.49315	537	4.49315	703
4.49276	535	4.49276	706
4.49238	525	4.49238	710
4.492	523	4.492	709
4.49161	513	4.49161	709
4.49123	507	4.49123	707
4.49085	506	4.49085	707
4.49046	500	4.49046	707
4.49008	499	4.49008	707
4.4897	498	4.4897	707
4.48931	502	4.48931	707
4.48893	502	4.48893	705
4.48854	503	4.48854	703
4.48816	505	4.48816	699
4.48778	505	4.48778	699
4.48739	504	4.48739	694
4.48701	504	4.48701	688
4.48663	504	4.48663	684
4.48624	507	4.48624	665
4.48586	508	4.48586	660
4.48547	510	4.48547	658
4.48509	519	4.48509	651
4.48471	521	4.48471	652
4.48432	526	4.48432	652
4.48394	529	4.48394	658
4.48356	531	4.48356	660
4.48317	538	4.48317	678
4.48279	540	4.48279	683
4.48241	541	4.48241	688
4.48202	544	4.48202	711
4.48164	543	4.48164	718
4.48125	541	4.48125	724
4.48087	529	4.48087	744
4.48049	526	4.48049	749
4.4801	518	4.4801	758
4.47972	515	4.47972	770
4.47934	514	4.47934	772
4.47895	507	4.47895	780
4.47857	506	4.47857	782
4.47818	505	4.47818	783
4.4778	501	4.4778	777
4.47742	501	4.47742	776
4.47703	500	4.47703	774
4.47665	500	4.47665	765
4.47627	499	4.47627	763
4.47588	496	4.47588	751
4.4755	494	4.4755	743
4.47512	494	4.47512	737
4.47473	490	4.47473	704
4.47435	490	4.47435	697
4.47396	489	4.47396	690
4.47358	490	4.47358	665
4.4732	491	4.4732	660
4.47281	493	4.47281	653
4.47243	493	4.47243	632
4.47205	493	4.47205	628
4.47166	493	4.47166	605
4.47128	493	4.47128	597
4.47089	493	4.47089	592
4.47051	493	4.47051	570
4.47013	492	4.47013	566
4.46974	491	4.46974	563
4.46936	489	4.46936	558
4.46898	489	4.46898	559
4.46859	491	4.46859	559
4.46821	493	4.46821	562
4.46783	494	4.46783	563
4.46744	499	4.46744	568
4.46706	500	4.46706	570
4.46667	502	4.46667	572
4.46629	500	4.46629	583
4.46591	499	4.46591	585
4.46552	496	4.46552	589
4.46514	496	4.46514	598
4.46476	496	4.46476	599
4.46437	496	4.46437	606
4.46399	496	4.46399	608
4.4636	496	4.4636	609
4.46322	497	4.46322	610
4.46284	498	4.46284	610
4.46245	500	4.46245	610
4.46207	507	4.46207	603
4.46169	508	4.46169	602
4.4613	512	4.4613	599
4.46092	515	4.46092	596
4.46053	516	4.46053	595
4.46015	521	4.46015	593
4.45977	522	4.45977	594
4.45938	524	4.45938	595
4.459	529	4.459	599
4.45862	530	4.45862	600
4.45823	531	4.45823	601
4.45785	533	4.45785	603
4.45747	534	4.45747	604
4.45708	540	4.45708	606
4.4567	544	4.4567	608
4.45631	547	4.45631	610
4.45593	559	4.45593	612
4.45555	561	4.45555	612
4.45516	564	4.45516	612
4.45478	573	4.45478	612
4.4544	574	4.4544	611
4.45401	579	4.45401	610
4.45363	582	4.45363	611
4.45324	584	4.45324	613
4.45286	593	4.45286	617
4.45248	596	4.45248	618
4.45209	599	4.45209	620
4.45171	609	4.45171	626
4.45133	611	4.45133	628
4.45094	615	4.45094	629
4.45056	624	4.45056	638
4.45018	626	4.45018	641
4.44979	633	4.44979	649
4.44941	635	4.44941	658
4.44902	637	4.44902	661
4.44864	644	4.44864	665
4.44826	645	4.44826	665
4.44787	645	4.44787	666
4.44749	643	4.44749	667
4.44711	643	4.44711	668
4.44672	643	4.44672	670
4.44634	642	4.44634	676
4.44595	640	4.44595	676
4.44557	638	4.44557	679
4.44519	643	4.44519	678
4.4448	645	4.4448	678
4.44442	657	4.44442	676
4.44404	661	4.44404	678
4.44365	666	4.44365	679
4.44327	682	4.44327	687
4.44289	686	4.44289	689
4.4425	701	4.4425	692
4.44212	707	4.44212	704
4.44173	710	4.44173	708
4.44135	721	4.44135	723
4.44097	724	4.44097	727
4.44058	726	4.44058	731
4.4402	735	4.4402	746
4.43982	737	4.43982	749
4.43943	740	4.43943	754
4.43905	745	4.43905	770
4.43866	746	4.43866	774
4.43828	758	4.43828	787
4.4379	763	4.4379	795
4.43751	765	4.43751	799
4.43713	779	4.43713	818
4.43675	782	4.43675	823
4.43636	786	4.43636	828
4.43598	796	4.43598	840
4.4356	798	4.4356	842
4.43521	805	4.43521	846
4.43483	810	4.43483	857
4.43444	812	4.43444	859
4.43406	822	4.43406	876
4.43368	825	4.43368	883
4.43329	827	4.43329	889
4.43291	836	4.43291	921
4.43253	838	4.43253	928
4.43214	842	4.43214	936
4.43176	857	4.43176	972
4.43137	862	4.43137	981
4.43099	884	4.43099	1009
4.43061	891	4.43061	1037
4.43022	897	4.43022	1047
4.42984	922	4.42984	1080
4.42946	928	4.42946	1086
4.42907	935	4.42907	1088
4.42869	968	4.42869	1095
4.42831	975	4.42831	1095
4.42792	993	4.42792	1094
4.42754	1014	4.42754	1092
4.42715	1020	4.42715	1091
4.42677	1048	4.42677	1080
4.42639	1055	4.42639	1076
4.426	1062	4.426	1074
4.42562	1087	4.42562	1061
4.42524	1092	4.42524	1057
4.42485	1096	4.42485	1054
4.42447	1114	4.42447	1043
4.42408	1118	4.42408	1041
4.4237	1137	4.4237	1037
4.42332	1144	4.42332	1026
4.42293	1150	4.42293	1024
4.42255	1179	4.42255	1013
4.42217	1186	4.42217	1011
4.42178	1193	4.42178	1011
4.4214	1222	4.4214	1007
4.42102	1228	4.42102	1007
4.42063	1236	4.42063	1008
4.42025	1259	4.42025	1018
4.41986	1263	4.41986	1019
4.41948	1288	4.41948	1027
4.4191	1295	4.4191	1033
4.41871	1302	4.41871	1036
4.41833	1333	4.41833	1061
4.41795	1340	4.41795	1067
4.41756	1353	4.41756	1072
4.41718	1410	4.41718	1102
4.41679	1426	4.41679	1110
4.41641	1472	4.41641	1121
4.41603	1517	4.41603	1157
4.41564	1533	4.41564	1165
4.41526	1594	4.41526	1210
4.41488	1607	4.41488	1231
4.41449	1609	4.41449	1247
4.41411	1625	4.41411	1325
4.41373	1627	4.41373	1344
4.41334	1626	4.41334	1364
4.41296	1608	4.41296	1460
4.41257	1599	4.41257	1483
4.41219	1534	4.41219	1525
4.41181	1510	4.41181	1619
4.41142	1495	4.41142	1641
4.41104	1423	4.41104	1732
4.41066	1408	4.41066	1739
4.41027	1393	4.41027	1741
4.40989	1339	4.40989	1754
4.4095	1328	4.4095	1752
4.40912	1312	4.40912	1747
4.40874	1285	4.40874	1670
4.40835	1282	4.40835	1647
4.40797	1273	4.40797	1498
4.40759	1270	4.40759	1447
4.4072	1269	4.4072	1410
4.40682	1266	4.40682	1256
4.40643	1267	4.40643	1226
4.40605	1268	4.40605	1199
4.40567	1273	4.40567	1104
4.40528	1274	4.40528	1084
4.4049	1284	4.4049	1058
4.40452	1288	4.40452	1006
4.40413	1291	4.40413	998
4.40375	1308	4.40375	980
4.40337	1312	4.40337	974
4.40298	1317	4.40298	972
4.4026	1343	4.4026	962
4.40221	1352	4.40221	962
4.40183	1366	4.40183	962
4.40145	1404	4.40145	965
4.40106	1413	4.40106	965
4.40068	1458	4.40068	969
4.4003	1470	4.4003	972
4.39991	1481	4.39991	974
4.39953	1526	4.39953	978
4.39914	1536	4.39914	979
4.39876	1544	4.39876	980
4.39838	1570	4.39838	1005
4.39799	1571	4.39799	1014
4.39761	1580	4.39761	1027
4.39723	1579	4.39723	1075
4.39684	1576	4.39684	1085
4.39646	1550	4.39646	1131
4.39608	1544	4.39608	1149
4.39569	1538	4.39569	1162
4.39531	1506	4.39531	1225
4.39492	1499	4.39492	1241
4.39454	1491	4.39454	1257
4.39416	1469	4.39416	1302
4.39377	1467	4.39377	1308
4.39339	1460	4.39339	1316
4.39301	1462	4.39301	1325
4.39262	1463	4.39262	1328
4.39224	1468	4.39224	1320
4.39185	1468	4.39185	1319
4.39147	1469	4.39147	1318
4.39109	1470	4.39109	1306
4.3907	1468	4.3907	1304
4.39032	1459	4.39032	1300
4.38994	1430	4.38994	1289
4.38955	1418	4.38955	1286
4.38917	1352	4.38917	1268
4.38879	1332	4.38879	1258
4.3884	1317	4.3884	1253
4.38802	1264	4.38802	1216
4.38763	1255	4.38763	1205
4.38725	1252	4.38725	1189
4.38687	1233	4.38687	1123
4.38648	1232	4.38648	1109
4.3861	1220	4.3861	1091
4.38572	1228	4.38572	1014
4.38533	1230	4.38533	994
4.38495	1255	4.38495	910
4.38456	1260	4.38456	884
4.38418	1267	4.38418	864
4.3838	1298	4.3838	803
4.38341	1304	4.38341	794
4.38303	1312	4.38303	786
4.38265	1333	4.38265	762
4.38226	1337	4.38226	760
4.38188	1347	4.38188	753
4.3815	1350	4.3815	756
4.38111	1352	4.38111	757
4.38073	1361	4.38073	768
4.38034	1364	4.38034	769
4.37996	1366	4.37996	772
4.37958	1382	4.37958	786
4.37919	1387	4.37919	789
4.37881	1406	4.37881	793
4.37843	1425	4.37843	807
4.37804	1432	4.37804	809
4.37766	1477	4.37766	824
4.37727	1490	4.37727	829
4.37689	1501	4.37689	833
4.37651	1549	4.37651	857
4.37612	1553	4.37612	862
4.37574	1554	4.37574	868
4.37536	1571	4.37536	896
4.37497	1570	4.37497	905
4.37459	1536	4.37459	924
4.37421	1530	4.37421	966
4.37382	1521	4.37382	977
4.37344	1439	4.37344	1026
4.37305	1415	4.37305	1039
4.37267	1389	4.37267	1040
4.37229	1286	4.37229	1061
4.3719	1264	4.3719	1061
4.37152	1226	4.37152	1059
4.37114	1164	4.37114	1031
4.37075	1151	4.37075	1018
4.37037	1089	4.37037	946
4.36998	1073	4.36998	902
4.3696	1059	4.3696	882
4.36922	1012	4.36922	783
4.36883	1004	4.36883	756
4.36845	998	4.36845	732
4.36807	977	4.36807	647
4.36768	973	4.36768	627
4.3673	964	4.3673	609
4.36692	961	4.36692	562
4.36653	961	4.36653	556
4.36615	958	4.36615	532
4.36576	960	4.36576	525
4.36538	960	4.36538	522
4.365	961	4.365	509
4.36461	961	4.36461	508
4.36423	959	4.36423	509
4.36385	955	4.36385	512
4.36346	953	4.36346	513
4.36308	938	4.36308	516
4.36269	932	4.36269	520
4.36231	925	4.36231	522
4.36193	892	4.36193	532
4.36154	884	4.36154	535
4.36116	875	4.36116	536
4.36078	845	4.36078	539
4.36039	841	4.36039	539
4.36001	828	4.36001	540
4.35963	816	4.35963	539
4.35924	812	4.35924	538
4.35886	790	4.35886	536
4.35847	783	4.35847	540
4.35809	779	4.35809	542
4.35771	767	4.35771	556
4.35732	765	4.35732	560
4.35694	763	4.35694	564
4.35656	760	4.35656	585
4.35617	760	4.35617	588
4.35579	760	4.35579	592
4.3554	760	4.3554	605
4.35502	760	4.35502	607
4.35464	770	4.35464	611
4.35425	774	4.35425	611
4.35387	778	4.35387	611
4.35349	794	4.35349	599
4.3531	798	4.3531	597
4.35272	806	4.35272	593
4.35234	820	4.35234	574
4.35195	822	4.35195	570
4.35157	830	4.35157	553
4.35118	832	4.35118	544
4.3508	833	4.3508	540
4.35042	826	4.35042	520
4.35003	825	4.35003	516
4.34965	817	4.34965	512
4.34927	788	4.34927	501
4.34888	782	4.34888	498
4.3485	751	4.3485	494
4.34811	733	4.34811	481
4.34773	724	4.34773	478
4.34735	680	4.34735	459
4.34696	670	4.34696	453
4.34658	659	4.34658	449
4.3462	620	4.3462	431
4.34581	612	4.34581	428
4.34543	602	4.34543	425
4.34504	570	4.34504	416
4.34466	563	4.34466	414
4.34428	535	4.34428	409
4.34389	528	4.34389	405
4.34351	525	4.34351	404
4.34313	513	4.34313	395
4.34274	510	4.34274	394
4.34236	508	4.34236	393
4.34198	499	4.34198	393
4.34159	497	4.34159	395
4.34121	489	4.34121	397
4.34082	481	4.34082	407
4.34044	480	4.34044	409
4.34006	480	4.34006	417
4.33967	481	4.33967	419
4.33929	482	4.33929	420
4.33891	483	4.33891	428
4.33852	484	4.33852	430
4.33814	485	4.33814	432
4.33775	485	4.33775	449
4.33737	485	4.33737	453
4.33699	487	4.33699	463
4.3366	489	4.3366	489
4.33622	489	4.33622	495
4.33584	490	4.33584	521
4.33545	489	4.33545	529
4.33507	489	4.33507	535
4.33469	492	4.33469	563
4.3343	492	4.3343	570
4.33392	495	4.33392	578
4.33353	498	4.33353	606
4.33315	499	4.33315	612
4.33277	502	4.33277	630
4.33238	503	4.33238	648
4.332	505	4.332	655
4.33162	512	4.33162	681
4.33123	513	4.33123	686
4.33085	515	4.33085	690
4.33046	520	4.33046	710
4.33008	521	4.33008	714
4.3297	526	4.3297	720
4.32931	529	4.32931	739
4.32893	530	4.32893	744
4.32855	534	4.32855	761
4.32816	535	4.32816	768
4.32778	536	4.32778	772
4.3274	534	4.3274	793
4.32701	534	4.32701	797
4.32663	533	4.32663	799
4.32624	532	4.32624	815
4.32586	532	4.32586	818
4.32548	529	4.32548	819
4.32509	528	4.32509	809
4.32471	526	4.32471	807
4.32433	519	4.32433	783
4.32394	517	4.32394	776
4.32356	515	4.32356	770
4.32317	507	4.32317	729
4.32279	505	4.32279	715
4.32241	502	4.32241	698
4.32202	498	4.32202	633
4.32164	497	4.32164	619
4.32126	495	4.32126	566
4.32087	493	4.32087	551
4.32049	492	4.32049	543
4.32011	488	4.32011	504
4.31972	487	4.31972	495
4.31934	486	4.31934	486
4.31895	484	4.31895	458
4.31857	484	4.31857	454
4.31819	484	4.31819	448
4.3178	484	4.3178	434
4.31742	483	4.31742	431
4.31704	477	4.31704	424
4.31665	476	4.31665	424
4.31627	475	4.31627	423
4.31588	474	4.31588	422
4.3155	474	4.3155	421
4.31512	474	4.31512	420
4.31473	474	4.31473	418
4.31435	474	4.31435	417
4.31397	471	4.31397	414
4.31358	470	4.31358	411
4.3132	469	4.3132	410
4.31282	465	4.31282	401
4.31243	463	4.31243	398
4.31205	460	4.31205	395
4.31166	448	4.31166	384
4.31128	445	4.31128	381
4.3109	435	4.3109	375
4.31051	429	4.31051	354
4.31013	427	4.31013	349
4.30975	418	4.30975	329
4.30936	416	4.30936	322
4.30898	414	4.30898	318
4.30859	410	4.30859	302
4.30821	409	4.30821	302
4.30783	409	4.30783	302
4.30744	408	4.30744	305
4.30706	407	4.30706	305
4.30668	406	4.30668	305
4.30629	405	4.30629	305
4.30591	404	4.30591	306
4.30553	400	4.30553	306
4.30514	400	4.30514	306
4.30476	399	4.30476	305
4.30437	398	4.30437	311
4.30399	398	4.30399	312
4.30361	393	4.30361	313
4.30322	387	4.30322	312
4.30284	385	4.30284	312
4.30246	383	4.30246	307
4.30207	383	4.30207	305
4.30169	383	4.30169	304
4.3013	383	4.3013	300
4.30092	385	4.30092	299
4.30054	385	4.30054	298
4.30015	384	4.30015	293
4.29977	383	4.29977	293
4.29939	378	4.29939	294
4.299	377	4.299	303
4.29862	378	4.29862	304
4.29824	386	4.29824	315
4.29785	387	4.29785	318
4.29747	388	4.29747	320
4.29708	393	4.29708	333
4.2967	394	4.2967	336
4.29632	395	4.29632	339
4.29593	391	4.29593	354
4.29555	390	4.29555	357
4.29517	386	4.29517	366
4.29478	388	4.29478	376
4.2944	389	4.2944	377
4.29401	391	4.29401	384
4.29363	393	4.29363	385
4.29325	394	4.29325	385
4.29286	402	4.29286	381
4.29248	403	4.29248	380
4.2921	405	4.2921	377
4.29171	405	4.29171	364
4.29133	403	4.29133	360
4.29094	407	4.29094	345
4.29056	408	4.29056	340
4.29018	410	4.29018	337
4.28979	417	4.28979	326
4.28941	418	4.28941	324
4.28903	419	4.28903	322
4.28864	420	4.28864	315
4.28826	420	4.28826	313
4.28788	420	4.28788	311
4.28749	420	4.28749	308
4.28711	420	4.28711	307
4.28672	422	4.28672	300
4.28634	422	4.28634	299
4.28596	423	4.28596	298
4.28557	417	4.28557	294
4.28519	416	4.28519	295
4.28481	412	4.28481	295
4.28442	408	4.28442	297
4.28404	407	4.28404	298
4.28365	405	4.28365	301
4.28327	405	4.28327	304
4.28289	405	4.28289	306
4.2825	407	4.2825	313
4.28212	408	4.28212	315
4.28174	409	4.28174	316
4.28135	410	4.28135	321
4.28097	410	4.28097	322
4.28059	414	4.28059	324
4.2802	417	4.2802	331
4.27982	418	4.27982	332
4.27943	423	4.27943	340
4.27905	424	4.27905	343
4.27867	424	4.27867	345
4.27828	421	4.27828	357
4.2779	420	4.2779	359
4.27752	418	4.27752	362
4.27713	417	4.27713	364
4.27675	416	4.27675	364
4.27636	416	4.27636	363
4.27598	418	4.27598	362
4.2756	419	4.2756	361
4.27521	418	4.27521	358
4.27483	418	4.27483	356
4.27445	416	4.27445	355
4.27406	412	4.27406	350
4.27368	411	4.27368	349
4.2733	408	4.2733	347
4.27291	405	4.27291	341
4.27253	404	4.27253	339
4.27214	403	4.27214	329
4.27176	404	4.27176	324
4.27138	405	4.27138	322
4.27099	405	4.27099	317
4.27061	405	4.27061	318
4.27023	404	4.27023	319
4.26984	401	4.26984	322
4.26946	401	4.26946	322
4.26907	401	4.26907	323
4.26869	401	4.26869	323
4.26831	401	4.26831	323
4.26792	402	4.26792	325
4.26754	401	4.26754	326
4.26716	401	4.26716	327
4.26677	400	4.26677	334
4.26639	399	4.26639	336
4.26601	400	4.26601	338
4.26562	407	4.26562	341
4.26524	408	4.26524	341
4.26485	411	4.26485	340
4.26447	409	4.26447	340
4.26409	409	4.26409	339
4.2637	407	4.2637	336
4.26332	406	4.26332	334
4.26294	404	4.26294	334
4.26255	402	4.26255	335
4.26217	401	4.26217	335
4.26178	398	4.26178	336
4.2614	397	4.2614	342
4.26102	396	4.26102	341
4.26063	392	4.26063	337
4.26025	392	4.26025	337
4.25987	391	4.25987	336
4.25948	393	4.25948	332
4.2591	394	4.2591	331
4.25872	395	4.25872	330
4.25833	395	4.25833	329
4.25795	395	4.25795	328
4.25756	395	4.25756	326
4.25718	393	4.25718	322
4.2568	393	4.2568	320
4.25641	393	4.25641	318
4.25603	393	4.25603	318
4.25565	394	4.25565	320
4.25526	399	4.25526	322
4.25488	401	4.25488	323
4.25449	405	4.25449	324
4.25411	411	4.25411	326
4.25373	412	4.25373	327
4.25334	418	4.25334	331
4.25296	419	4.25296	333
4.25258	421	4.25258	334
4.25219	423	4.25219	335
4.25181	424	4.25181	336
4.25143	425	4.25143	337
4.25104	428	4.25104	339
4.25066	428	4.25066	341
4.25027	431	4.25027	344
4.24989	432	4.24989	348
4.24951	433	4.24951	350
4.24912	434	4.24912	356
4.24874	435	4.24874	358
4.24836	436	4.24836	359
4.24797	438	4.24797	367
4.24759	440	4.24759	369
4.2472	444	4.2472	371
4.24682	455	4.24682	378
4.24644	458	4.24644	379
4.24605	474	4.24605	382
4.24567	479	4.24567	385
4.24529	483	4.24529	386
4.2449	500	4.2449	387
4.24452	503	4.24452	388
4.24414	508	4.24414	389
4.24375	524	4.24375	390
4.24337	528	4.24337	391
4.24298	542	4.24298	395
4.2426	549	4.2426	407
4.24222	554	4.24222	410
4.24183	571	4.24183	420
4.24145	575	4.24145	423
4.24107	577	4.24107	426
4.24068	589	4.24068	438
4.2403	592	4.2403	442
4.23991	593	4.23991	446
4.23953	590	4.23953	466
4.23915	588	4.23915	471
4.23876	571	4.23876	478
4.23838	567	4.23838	494
4.238	563	4.238	496
4.23761	545	4.23761	502
4.23723	541	4.23723	502
4.23684	537	4.23684	501
4.23646	518	4.23646	484
4.23608	514	4.23608	482
4.23569	508	4.23569	474
4.23531	503	4.23531	451
4.23493	502	4.23493	446
4.23454	502	4.23454	428
4.23416	504	4.23416	422
[truncated: 7,126 more rows]
