# Supplementary material for: Dual-modal metabolic analysis reveals hypothermia-reversible uncoupling of oxidative phosphorylation in neonatal brain hypoxia-ischemia
Source: eLife. 2025 Dec 29;13:RP100129. doi: 10.7554/eLife.100129 (PMC12747520; doi:10.7554/eLife.100129)
Supplement: Figure 4—source data 6. [file elife-100129-fig4-data6.xlsx]

## Sheet: Figure 4I
NMR analysis @ 32°C
Contralateral		Ipsilaateral
x	y	x	y
5	494	5	415
4.99962	494	4.99962	415
4.99923	494	4.99923	415
4.99885	494	4.99885	415
4.99847	494	4.99847	415
4.99808	494	4.99808	415
4.9977	493	4.9977	414
4.99731	486	4.99731	412
4.99693	484	4.99693	410
4.99655	475	4.99655	409
4.99616	472	4.99616	404
4.99578	471	4.99578	403
4.9954	468	4.9954	401
4.99501	470	4.99501	398
4.99463	471	4.99463	398
4.99424	477	4.99424	398
4.99386	477	4.99386	399
4.99348	479	4.99348	400
4.99309	479	4.99309	400
4.99271	479	4.99271	404
4.99233	479	4.99233	404
4.99194	479	4.99194	412
4.99156	478	4.99156	413
4.99118	476	4.99118	415
4.99079	477	4.99079	417
4.99041	478	4.99041	418
4.99002	482	4.99002	419
4.98964	483	4.98964	422
4.98926	484	4.98926	423
4.98887	487	4.98887	426
4.98849	487	4.98849	426
4.98811	490	4.98811	426
4.98772	490	4.98772	416
4.98734	490	4.98734	414
4.98695	490	4.98695	413
4.98657	490	4.98657	409
4.98619	488	4.98619	408
4.9858	486	4.9858	408
4.98542	485	4.98542	408
4.98504	479	4.98504	408
4.98465	477	4.98465	413
4.98427	475	4.98427	414
4.98389	473	4.98389	413
4.9835	473	4.9835	414
4.98312	473	4.98312	415
4.98273	475	4.98273	415
4.98235	476	4.98235	417
4.98197	479	4.98197	418
4.98158	481	4.98158	420
4.9812	481	4.9812	420
4.98082	483	4.98082	419
4.98043	483	4.98043	411
4.98005	482	4.98005	410
4.97966	482	4.97966	408
4.97928	483	4.97928	407
4.9789	483	4.9789	408
4.97851	487	4.97851	409
4.97813	488	4.97813	411
4.97775	489	4.97775	412
4.97736	488	4.97736	412
4.97698	487	4.97698	411
4.9766	487	4.9766	411
4.97621	488	4.97621	409
4.97583	489	4.97583	406
4.97544	492	4.97544	405
4.97506	492	4.97506	400
4.97468	493	4.97468	399
4.97429	495	4.97429	397
4.97391	495	4.97391	397
4.97353	498	4.97353	399
4.97314	498	4.97314	399
4.97276	499	4.97276	399
4.97237	498	4.97237	399
4.97199	498	4.97199	405
4.97161	498	4.97161	406
4.97122	498	4.97122	408
4.97084	497	4.97084	418
4.97046	495	4.97046	420
4.97007	494	4.97007	423
4.96969	493	4.96969	425
4.9693	491	4.9693	426
4.96892	489	4.96892	424
4.96854	488	4.96854	423
4.96815	491	4.96815	422
4.96777	492	4.96777	418
4.96739	494	4.96739	419
4.967	500	4.967	419
4.96662	500	4.96662	422
4.96624	501	4.96624	423
4.96585	501	4.96585	426
4.96547	502	4.96547	428
4.96508	504	4.96508	430
4.9647	505	4.9647	431
4.96432	507	4.96432	431
4.96393	515	4.96393	431
4.96355	517	4.96355	430
4.96317	519	4.96317	430
4.96278	520	4.96278	429
4.9624	520	4.9624	429
4.96201	520	4.96201	430
4.96163	519	4.96163	430
4.96125	519	4.96125	433
4.96086	521	4.96086	433
4.96048	522	4.96048	439
4.9601	525	4.9601	440
4.95971	533	4.95971	443
4.95933	534	4.95933	447
4.95895	538	4.95895	447
4.95856	541	4.95856	450
4.95818	541	4.95818	452
4.95779	543	4.95779	453
4.95741	544	4.95741	452
4.95703	545	4.95703	451
4.95664	548	4.95664	450
4.95626	549	4.95626	447
4.95588	550	4.95588	445
4.95549	552	4.95549	444
4.95511	553	4.95511	443
4.95472	553	4.95472	443
4.95434	554	4.95434	443
4.95396	555	4.95396	443
4.95357	556	4.95357	444
4.95319	557	4.95319	447
4.95281	558	4.95281	448
4.95242	560	4.95242	450
4.95204	560	4.95204	456
4.95166	562	4.95166	458
4.95127	565	4.95127	464
4.95089	565	4.95089	471
4.9505	570	4.9505	473
4.95012	572	4.95012	480
4.94974	573	4.94974	482
4.94935	578	4.94935	483
4.94897	579	4.94897	492
4.94859	582	4.94859	493
4.9482	583	4.9482	496
4.94782	584	4.94782	501
4.94743	590	4.94743	502
4.94705	592	4.94705	506
4.94667	594	4.94667	508
4.94628	601	4.94628	509
4.9459	603	4.9459	513
4.94552	604	4.94552	513
4.94513	610	4.94513	514
4.94475	611	4.94475	513
4.94437	614	4.94437	512
4.94398	617	4.94398	511
4.9436	619	4.9436	511
4.94321	624	4.94321	512
4.94283	625	4.94283	521
4.94245	626	4.94245	523
4.94206	631	4.94206	525
4.94168	633	4.94168	535
4.9413	634	4.9413	537
4.94091	644	4.94091	539
4.94053	646	4.94053	549
4.94014	653	4.94014	551
4.93976	659	4.93976	559
4.93938	661	4.93938	564
4.93899	675	4.93899	565
4.93861	678	4.93861	572
4.93823	682	4.93823	574
4.93784	692	4.93784	576
4.93746	693	4.93746	579
4.93708	695	4.93708	579
4.93669	696	4.93669	579
4.93631	695	4.93631	578
4.93592	700	4.93592	578
4.93554	703	4.93554	578
4.93516	704	4.93516	580
4.93477	713	4.93477	582
4.93439	714	4.93439	589
4.93401	714	4.93401	591
4.93362	712	4.93362	592
4.93324	711	4.93324	593
4.93285	710	4.93285	592
4.93247	707	4.93247	591
4.93209	707	4.93209	592
4.9317	703	4.9317	592
4.93132	702	4.93132	594
4.93094	701	4.93094	595
4.93055	699	4.93055	596
4.93017	698	4.93017	603
4.92979	696	4.92979	604
4.9294	687	4.9294	607
4.92902	685	4.92902	611
4.92863	681	4.92863	611
4.92825	681	4.92825	612
4.92787	681	4.92787	605
4.92748	684	4.92748	604
4.9271	685	4.9271	600
4.92672	687	4.92672	600
4.92633	691	4.92633	601
4.92595	691	4.92595	602
4.92556	691	4.92556	603
4.92518	691	4.92518	604
4.9248	692	4.9248	606
4.92441	697	4.92441	607
4.92403	700	4.92403	613
4.92365	701	4.92365	616
4.92326	705	4.92326	617
4.92288	705	4.92288	621
4.9225	706	4.9225	621
4.92211	705	4.92211	623
4.92173	705	4.92173	626
4.92134	705	4.92134	627
4.92096	708	4.92096	630
4.92058	709	4.92058	632
4.92019	710	4.92019	632
4.91981	711	4.91981	631
4.91943	710	4.91943	631
4.91904	710	4.91904	630
4.91866	710	4.91866	629
4.91827	709	4.91827	628
4.91789	710	4.91789	626
4.91751	710	4.91751	624
4.91712	712	4.91712	623
4.91674	712	4.91674	623
4.91636	711	4.91636	624
4.91597	707	4.91597	624
4.91559	706	4.91559	627
4.9152	704	4.9152	629
4.91482	701	4.91482	630
4.91444	701	4.91444	633
4.91405	701	4.91405	633
4.91367	701	4.91367	635
4.91329	701	4.91329	632
4.9129	700	4.9129	631
4.91252	700	4.91252	625
4.91214	699	4.91214	623
4.91175	692	4.91175	622
4.91137	691	4.91137	619
4.91098	689	4.91098	619
4.9106	685	4.9106	619
4.91022	685	4.91022	621
4.90983	684	4.90983	622
4.90945	685	4.90945	621
4.90907	685	4.90907	619
4.90868	685	4.90868	618
4.9083	684	4.9083	616
4.90791	683	4.90791	615
4.90753	679	4.90753	614
4.90715	679	4.90715	610
4.90676	677	4.90676	609
4.90638	676	4.90638	608
4.906	677	4.906	610
4.90561	681	4.90561	610
4.90523	682	4.90523	610
4.90485	683	4.90485	610
4.90446	689	4.90446	610
4.90408	691	4.90408	609
4.90369	694	4.90369	608
4.90331	708	4.90331	607
4.90293	711	4.90293	604
4.90254	719	4.90254	605
4.90216	727	4.90216	611
4.90178	729	4.90178	618
4.90139	732	4.90139	622
4.90101	733	4.90101	637
4.90062	734	4.90062	641
4.90024	740	4.90024	644
4.89986	743	4.89986	654
4.89947	747	4.89947	655
4.89909	758	4.89909	656
4.89871	760	4.89871	657
4.89832	770	4.89832	658
4.89794	773	4.89794	665
4.89756	775	4.89756	668
4.89717	784	4.89717	669
4.89679	786	4.89679	673
4.8964	788	4.8964	671
4.89602	787	4.89602	670
4.89564	786	4.89564	666
4.89525	782	4.89525	664
4.89487	771	4.89487	658
4.89449	768	4.89449	650
4.8941	747	4.8941	648
4.89372	741	4.89372	631
4.89333	736	4.89333	626
4.89295	713	4.89295	621
4.89257	708	4.89257	602
4.89218	702	4.89218	598
4.8918	681	4.8918	594
4.89142	677	4.89142	577
4.89103	667	4.89103	574
4.89065	662	4.89065	562
4.89027	659	4.89027	555
4.88988	650	4.88988	554
4.8895	649	4.8895	546
4.88911	648	4.88911	548
4.88873	642	4.88873	548
4.88835	641	4.88835	542
4.88796	638	4.88796	542
4.88758	635	4.88758	541
4.8872	634	4.8872	534
4.88681	633	4.88681	533
4.88643	633	4.88643	536
4.88604	634	4.88604	537
4.88566	642	4.88566	538
4.88528	643	4.88528	542
4.88489	645	4.88489	542
4.88451	652	4.88451	543
4.88413	653	4.88413	542
4.88374	658	4.88374	542
4.88336	663	4.88336	539
4.88298	665	4.88298	545
4.88259	671	4.88259	547
4.88221	672	4.88221	559
4.88182	674	4.88182	562
4.88144	685	4.88144	565
4.88106	690	4.88106	576
4.88067	697	4.88067	579
4.88029	725	4.88029	584
4.87991	731	4.87991	598
4.87952	759	4.87952	601
4.87914	767	4.87914	616
4.87875	775	4.87875	620
4.87837	813	4.87837	624
4.87799	821	4.87799	638
4.8776	831	4.8776	641
4.87722	878	4.87722	645
4.87684	889	4.87684	662
4.87645	911	4.87645	667
4.87607	957	4.87607	677
4.87569	968	4.87569	699
4.8753	1019	4.8753	705
4.87492	1032	4.87492	731
4.87453	1041	4.87453	739
4.87415	1081	4.87415	745
4.87377	1085	4.87377	775
4.87338	1088	4.87338	781
4.873	1099	4.873	785
4.87262	1097	4.87262	802
4.87223	1057	4.87223	804
4.87185	1043	4.87185	806
4.87146	1033	4.87146	799
4.87108	970	4.87108	798
4.8707	953	4.8707	776
4.87031	936	4.87031	768
4.86993	866	4.86993	755
4.86955	851	4.86955	699
4.86916	831	4.86916	686
4.86878	773	4.86878	669
4.8684	765	4.8684	614
4.86801	733	4.86801	603
4.86763	725	4.86763	561
4.86724	718	4.86724	549
4.86686	693	4.86686	540
4.86648	689	4.86648	516
4.86609	684	4.86609	513
4.86571	670	4.86571	510
4.86533	666	4.86533	500
4.86494	660	4.86494	498
4.86456	652	4.86456	493
4.86417	651	4.86417	488
4.86379	646	4.86379	487
4.86341	644	4.86341	481
4.86302	643	4.86302	481
4.86264	638	4.86264	482
4.86226	638	4.86226	493
4.86187	636	4.86187	494
4.86149	639	4.86149	496
4.86111	640	4.86111	499
4.86072	647	4.86072	500
4.86034	649	4.86034	502
4.85995	652	4.85995	504
4.85957	671	4.85957	505
4.85919	677	4.85919	507
4.8588	682	4.8588	509
4.85842	708	4.85842	511
4.85804	715	4.85804	522
4.85765	723	4.85765	526
4.85727	750	4.85727	533
4.85688	757	4.85688	556
4.8565	787	4.8565	561
4.85612	798	4.85612	589
4.85573	808	4.85573	598
4.85535	854	4.85535	604
4.85497	865	4.85497	629
4.85458	878	4.85458	634
4.8542	926	4.8542	641
4.85381	937	4.85381	670
4.85343	979	4.85343	678
4.85305	998	4.85305	704
4.85266	1009	4.85266	717
4.85228	1049	4.85228	724
4.8519	1054	4.8519	752
4.85151	1056	4.85151	758
4.85113	1071	4.85113	760
4.85075	1070	4.85075	775
4.85036	1068	4.85036	778
4.84998	1037	4.84998	779
4.84959	1027	4.84959	772
4.84921	954	4.84921	771
4.84883	932	4.84883	745
4.84844	913	4.84844	735
4.84806	838	4.84806	728
4.84768	823	4.84768	682
4.84729	808	4.84729	670
4.84691	749	4.84691	656
4.84652	736	4.84652	597
4.84614	709	4.84614	584
4.84576	679	4.84576	555
4.84537	673	4.84537	522
4.84499	651	4.84499	517
4.84461	645	4.84461	499
4.84422	640	4.84422	494
4.84384	619	4.84384	489
4.84346	615	4.84346	473
4.84307	612	4.84307	470
4.84269	603	4.84269	468
4.8423	602	4.8423	458
4.84192	595	4.84192	455
4.84154	591	4.84154	446
4.84115	590	4.84115	442
4.84077	580	4.84077	441
4.84039	579	4.84039	436
4.84	577	4.84	437
4.83962	573	4.83962	439
4.83923	574	4.83923	444
4.83885	574	4.83885	446
4.83847	574	4.83847	448
4.83808	574	4.83808	452
4.8377	575	4.8377	453
4.83732	574	4.83732	452
4.83693	575	4.83693	452
4.83655	578	4.83655	452
4.83617	578	4.83617	451
4.83578	580	4.83578	450
4.8354	588	4.8354	449
4.83501	589	4.83501	449
4.83463	594	4.83463	450
4.83425	598	4.83425	453
4.83386	600	4.83386	455
4.83348	605	4.83348	456
4.8331	607	4.8331	457
4.83271	608	4.83271	457
4.83233	618	4.83233	457
4.83194	620	4.83194	458
4.83156	623	4.83156	460
4.83118	634	4.83118	462
4.83079	636	4.83079	468
4.83041	643	4.83041	471
4.83003	645	4.83003	482
4.82964	646	4.82964	485
4.82926	649	4.82926	487
4.82888	649	4.82888	488
4.82849	648	4.82849	488
4.82811	644	4.82811	488
4.82772	643	4.82772	492
4.82734	637	4.82734	492
4.82696	625	4.82696	493
4.82657	620	4.82657	492
4.82619	597	4.82619	491
4.82581	591	4.82581	480
4.82542	585	4.82542	477
4.82504	563	4.82504	474
4.82465	557	4.82465	462
4.82427	554	4.82427	459
4.82389	544	4.82389	456
4.8235	543	4.8235	444
4.82312	538	4.82312	441
4.82274	535	4.82274	428
4.82235	533	4.82235	422
4.82197	526	4.82197	419
4.82159	524	4.82159	403
4.8212	522	4.8212	400
4.82082	516	4.82082	397
4.82043	515	4.82043	395
4.82005	512	4.82005	394
4.81967	511	4.81967	395
4.81928	509	4.81928	397
4.8189	513	4.8189	398
4.81852	514	4.81852	402
4.81813	515	4.81813	403
4.81775	521	4.81775	404
4.81736	522	4.81736	404
4.81698	523	4.81698	403
4.8166	526	4.8166	403
4.81621	526	4.81621	403
4.81583	525	4.81583	402
4.81545	524	4.81545	402
4.81506	523	4.81506	404
4.81468	523	4.81468	404
4.8143	523	4.8143	409
4.81391	522	4.81391	410
4.81353	521	4.81353	411
4.81314	520	4.81314	416
4.81276	520	4.81276	417
4.81238	519	4.81238	419
4.81199	518	4.81199	417
4.81161	518	4.81161	416
4.81123	521	4.81123	409
4.81084	522	4.81084	407
4.81046	527	4.81046	407
4.81007	528	4.81007	405
4.80969	527	4.80969	406
4.80931	525	4.80931	407
4.80892	524	4.80892	414
4.80854	521	4.80854	414
4.80816	521	4.80816	418
4.80777	520	4.80777	416
4.80739	518	4.80739	415
4.80701	522	4.80701	414
4.80662	523	4.80662	414
4.80624	531	4.80624	414
4.80585	533	4.80585	417
4.80547	535	4.80547	418
4.80509	545	4.80509	420
4.8047	547	4.8047	426
4.80432	553	4.80432	427
4.80394	558	4.80394	433
4.80355	559	4.80355	437
4.80317	563	4.80317	439
4.80278	564	4.80278	449
4.8024	565	4.8024	451
4.80202	569	4.80202	452
4.80163	570	4.80163	453
4.80125	574	4.80125	452
4.80087	584	4.80087	452
4.80048	586	4.80048	453
4.8001	594	4.8001	454
4.79971	595	4.79971	456
4.79933	596	4.79933	457
4.79895	604	4.79895	460
4.79856	606	4.79856	469
4.79818	608	4.79818	472
4.7978	615	4.7978	474
4.79741	617	4.79741	482
4.79703	622	4.79703	483
4.79665	628	4.79665	488
4.79626	630	4.79626	493
4.79588	637	4.79588	495
4.79549	639	4.79549	497
4.79511	641	4.79511	496
4.79473	643	4.79473	495
4.79434	644	4.79434	492
4.79396	645	4.79396	491
4.79358	646	4.79358	490
4.79319	647	4.79319	488
4.79281	655	4.79281	487
4.79242	659	4.79242	489
4.79204	662	4.79204	491
4.79166	674	4.79166	492
4.79127	676	4.79127	500
4.79089	679	4.79089	502
4.79051	689	4.79051	504
4.79012	691	4.79012	512
4.78974	695	4.78974	513
4.78936	707	4.78936	518
4.78897	711	4.78897	526
4.78859	736	4.78859	529
4.7882	742	4.7882	545
4.78782	748	4.78782	550
4.78744	771	4.78744	553
4.78705	775	4.78705	567
4.78667	780	4.78667	570
4.78629	800	4.78629	573
4.7859	805	4.7859	592
4.78552	819	4.78552	597
4.78513	828	4.78513	604
4.78475	830	4.78475	609
4.78437	833	4.78437	610
4.78398	834	4.78398	618
4.7836	835	4.7836	619
4.78322	841	4.78322	621
4.78283	844	4.78283	629
4.78245	846	4.78245	630
4.78207	857	4.78207	632
4.78168	859	4.78168	639
4.7813	870	4.7813	639
4.78091	873	4.78091	638
4.78053	875	4.78053	637
4.78015	886	4.78015	636
4.77976	889	4.77976	639
4.77938	892	4.77938	640
4.779	903	4.779	641
4.77861	906	4.77861	646
4.77823	916	4.77823	647
4.77784	925	4.77784	652
4.77746	929	4.77746	657
4.77708	943	4.77708	659
4.77669	945	4.77669	667
4.77631	946	4.77631	669
4.77593	949	4.77593	670
4.77554	949	4.77554	674
4.77516	947	4.77516	675
4.77478	940	4.77478	676
4.77439	937	4.77439	677
4.77401	915	4.77401	675
4.77362	906	4.77362	665
4.77324	901	4.77324	660
4.77286	872	4.77286	658
4.77247	865	4.77247	641
4.77209	858	4.77209	636
4.77171	832	4.77171	632
4.77132	826	4.77132	613
4.77094	818	4.77094	609
4.77055	804	4.77055	604
4.77017	803	4.77017	593
4.76979	802	4.76979	591
4.7694	801	4.7694	585
4.76902	801	4.76902	584
4.76864	801	4.76864	583
4.76825	801	4.76825	580
4.76787	800	4.76787	580
4.76749	793	4.76749	582
4.7671	791	4.7671	589
4.76672	786	4.76672	590
4.76633	782	4.76633	595
4.76595	781	4.76595	598
4.76557	773	4.76557	599
4.76518	771	4.76518	597
4.7648	768	4.7648	597
4.76442	755	4.76442	595
4.76403	752	4.76403	582
4.76365	747	4.76365	580
4.76326	736	4.76326	576
4.76288	734	4.76288	575
4.7625	725	4.7625	575
4.76211	723	4.76211	577
4.76173	722	4.76173	578
4.76135	721	4.76135	579
4.76096	720	4.76096	583
4.76058	719	4.76058	584
4.7602	718	4.7602	586
4.75981	719	4.75981	583
4.75943	720	4.75943	582
4.75904	722	4.75904	573
4.75866	723	4.75866	575
4.75828	729	4.75828	575
4.75789	730	4.75789	579
4.75751	731	4.75751	579
4.75713	735	4.75713	580
4.75674	735	4.75674	581
4.75636	735	4.75636	582
4.75597	736	4.75597	584
4.75559	736	4.75559	590
4.75521	740	4.75521	592
4.75482	743	4.75482	598
4.75444	742	4.75444	601
4.75406	741	4.75406	602
4.75367	740	4.75367	601
4.75329	739	4.75329	601
4.75291	735	4.75291	600
4.75252	734	4.75252	593
4.75214	731	4.75214	593
4.75175	727	4.75175	593
4.75137	726	4.75137	594
4.75099	723	4.75099	594
4.7506	721	4.7506	593
4.75022	720	4.75022	591
4.74984	713	4.74984	591
4.74945	711	4.74945	581
4.74907	708	4.74907	578
4.74868	697	4.74868	575
4.7483	695	4.7483	563
4.74792	689	4.74792	561
4.74753	683	4.74753	561
4.74715	682	4.74715	564
4.74677	679	4.74677	565
4.74638	678	4.74638	566
4.746	677	4.746	565
4.74561	677	4.74561	565
4.74523	679	4.74523	565
4.74485	682	4.74485	564
4.74446	694	4.74446	561
4.74408	697	4.74408	565
4.7437	708	4.7437	567
4.74331	713	4.74331	572
4.74293	715	4.74293	574
4.74255	724	4.74255	575
4.74216	727	4.74216	587
4.74178	729	4.74178	590
4.74139	744	4.74139	593
4.74101	749	4.74101	610
4.74063	761	4.74063	614
4.74024	780	4.74024	623
4.73986	786	4.73986	636
4.73948	813	4.73948	640
4.73909	821	4.73909	651
4.73871	827	4.73871	654
4.73832	848	4.73832	656
4.73794	853	4.73794	670
4.73756	858	4.73756	673
4.73717	879	4.73717	676
4.73679	883	4.73679	694
4.73641	905	4.73641	699
4.73602	911	4.73602	714
4.73564	916	4.73564	719
4.73526	940	4.73526	722
4.73487	945	4.73487	730
4.73449	950	4.73449	732
4.7341	968	4.7341	733
4.73372	972	4.73372	739
4.73334	975	4.73334	740
4.73295	984	4.73295	744
4.73257	985	4.73257	747
4.73219	981	4.73219	748
4.7318	979	4.7318	752
4.73142	978	4.73142	753
4.73103	966	4.73103	754
4.73065	962	4.73065	755
4.73027	957	4.73027	754
4.72988	940	4.72988	754
4.7295	935	4.7295	743
4.72912	927	4.72912	741
4.72873	919	4.72873	735
4.72835	917	4.72835	728
4.72797	905	4.72797	725
4.72758	902	4.72758	712
4.7272	899	4.7272	709
4.72681	885	4.72681	706
4.72643	880	4.72643	689
4.72605	873	4.72605	685
4.72566	848	4.72566	680
4.72528	843	4.72528	667
4.7249	817	4.7249	664
4.72451	810	4.72451	656
4.72413	806	4.72413	653
4.72374	794	4.72374	652
4.72336	791	4.72336	642
4.72298	788	4.72298	640
4.72259	779	4.72259	637
4.72221	777	4.72221	626
4.72183	775	4.72183	625
4.72144	773	4.72144	625
4.72106	772	4.72106	627
4.72068	769	4.72068	627
4.72029	772	4.72029	627
4.71991	773	4.71991	628
4.71952	782	4.71952	629
4.71914	784	4.71914	635
4.71876	787	4.71876	636
4.71837	798	4.71837	638
4.71799	800	4.71799	649
4.71761	813	4.71761	653
4.71722	820	4.71722	671
4.71684	824	4.71684	680
4.71645	841	4.71645	685
4.71607	846	4.71607	706
4.71569	851	4.71569	711
4.7153	871	4.7153	717
4.71492	876	4.71492	744
4.71454	881	4.71454	750
4.71415	895	4.71415	757
4.71377	897	4.71377	775
4.71339	906	4.71339	778
4.713	909	4.713	788
4.71262	911	4.71262	790
4.71223	919	4.71223	791
4.71185	921	4.71185	795
4.71147	922	4.71147	794
4.71108	925	4.71108	793
4.7107	925	4.7107	787
4.71032	925	4.71032	786
4.70993	925	4.70993	777
4.70955	924	4.70955	770
4.70916	923	4.70916	767
4.70878	922	4.70878	752
4.7084	922	4.7084	749
4.70801	921	4.70801	747
4.70763	921	4.70763	740
4.70725	919	4.70725	739
4.70686	917	4.70686	738
4.70648	916	4.70648	734
4.7061	914	4.7061	734
4.70571	916	4.70571	735
4.70533	917	4.70533	735
4.70494	928	4.70494	736
4.70456	931	4.70456	738
4.70418	934	4.70418	739
4.70379	945	4.70379	740
4.70341	948	4.70341	746
4.70303	955	4.70303	748
4.70264	973	4.70264	753
4.70226	977	4.70226	761
4.70187	998	4.70187	763
4.70149	1004	4.70149	772
4.70111	1008	4.70111	774
4.70072	1027	4.70072	777
4.70034	1031	4.70034	792
4.69996	1035	4.69996	795
4.69957	1054	4.69957	799
4.69919	1057	4.69919	821
4.69881	1069	4.69881	825
4.69842	1077	4.69842	841
4.69804	1078	4.69804	851
4.69765	1087	4.69765	855
4.69727	1086	4.69727	873
4.69689	1084	4.69689	877
4.6965	1072	4.6965	881
4.69612	1070	4.69612	894
4.69574	1064	4.69574	895
4.69535	1043	4.69535	897
4.69497	1038	4.69497	899
4.69458	1023	4.69458	898
4.6942	1019	4.6942	890
4.69382	1018	4.69382	888
4.69343	1013	4.69343	886
4.69305	1013	4.69305	866
4.69267	1013	4.69267	861
4.69228	1017	4.69228	858
4.6919	1018	4.6919	844
4.69152	1023	4.69152	842
4.69113	1028	4.69113	842
4.69075	1031	4.69075	846
4.69036	1048	4.69036	846
4.68998	1053	4.68998	857
4.6896	1057	4.6896	860
4.68921	1079	4.68921	862
4.68883	1085	4.68883	872
4.68845	1092	4.68845	874
4.68806	1116	4.68806	876
4.68768	1121	4.68768	879
4.68729	1144	4.68729	880
4.68691	1154	4.68691	884
4.68653	1161	4.68653	888
4.68614	1196	4.68614	890
4.68576	1205	4.68576	900
4.68538	1214	4.68538	902
4.68499	1251	4.68499	905
4.68461	1259	4.68461	922
4.68422	1270	4.68422	928
4.68384	1304	4.68384	934
4.68346	1312	4.68346	957
4.68307	1345	4.68307	962
4.68269	1354	4.68269	987
4.68231	1361	4.68231	995
4.68192	1386	4.68192	1001
4.68154	1392	4.68154	1026
4.68116	1398	4.68116	1031
4.68077	1422	4.68077	1038
4.68039	1426	4.68039	1065
4.68	1444	4.68	1072
4.67962	1454	4.67962	1096
4.67924	1459	4.67924	1107
4.67885	1478	4.67885	1112
4.67847	1482	4.67847	1139
4.67809	1486	4.67809	1145
4.6777	1500	4.6777	1151
4.67732	1503	4.67732	1178
4.67693	1505	4.67693	1184
4.67655	1513	4.67655	1193
4.67617	1513	4.67617	1212
4.67578	1508	4.67578	1216
4.6754	1506	4.6754	1233
4.67502	1504	4.67502	1238
4.67463	1490	4.67463	1242
4.67425	1486	4.67425	1266
4.67387	1482	4.67387	1270
4.67348	1465	4.67348	1271
4.6731	1462	4.6731	1281
4.67271	1453	4.67271	1278
4.67233	1442	4.67233	1273
4.67195	1441	4.67195	1261
4.67156	1435	4.67156	1254
4.67118	1434	4.67118	1213
4.6708	1433	4.6708	1202
4.67041	1445	4.67041	1192
4.67003	1447	4.67003	1159
4.66964	1454	4.66964	1155
4.66926	1483	4.66926	1151
4.66888	1490	4.66888	1137
4.66849	1518	4.66849	1136
4.66811	1528	4.66811	1132
4.66773	1535	4.66773	1134
4.66734	1571	4.66734	1136
4.66696	1579	4.66696	1153
4.66658	1588	4.66658	1156
4.66619	1624	4.66619	1160
4.66581	1631	4.66581	1181
4.66542	1639	4.66542	1188
4.66504	1657	4.66504	1200
4.66466	1659	4.66466	1232
4.66427	1665	4.66427	1240
4.66389	1664	4.66389	1277
4.66351	1664	4.66351	1287
4.66312	1657	4.66312	1296
4.66274	1655	4.66274	1336
4.66235	1654	4.66235	1345
4.66197	1645	4.66197	1355
4.66159	1645	4.66159	1387
4.6612	1638	4.6612	1389
4.66082	1628	4.66082	1397
4.66044	1624	4.66044	1395
4.66005	1598	4.66005	1394
4.65967	1588	4.65967	1390
4.65929	1576	4.65929	1388
4.6589	1521	4.6589	1382
4.65852	1508	4.65852	1350
4.65813	1493	4.65813	1343
4.65775	1440	4.65775	1332
4.65737	1428	4.65737	1285
4.65698	1383	4.65698	1271
4.6566	1365	4.6566	1213
4.65622	1353	4.65622	1191
4.65583	1305	4.65583	1177
4.65545	1293	4.65545	1114
4.65506	1282	4.65506	1101
4.65468	1242	4.65468	1087
4.6543	1233	4.6543	1038
4.65391	1218	4.65391	1027
4.65353	1192	4.65353	1009
4.65315	1188	4.65315	980
4.65276	1177	4.65276	975
4.65238	1174	4.65238	956
4.652	1172	4.652	951
4.65161	1163	4.65161	947
4.65123	1162	4.65123	928
4.65084	1160	4.65084	924
4.65046	1160	4.65046	922
4.65008	1160	4.65008	918
4.64969	1162	4.64969	919
4.64931	1165	4.64931	923
4.64893	1169	4.64893	925
4.64854	1189	4.64854	927
4.64816	1195	4.64816	933
4.64777	1200	4.64777	935
4.64739	1226	4.64739	936
4.64701	1231	4.64701	945
4.64662	1241	4.64662	948
4.64624	1267	4.64624	957
4.64586	1273	4.64586	976
4.64547	1300	4.64547	981
4.64509	1309	4.64509	1003
4.64471	1310	4.64471	1010
4.64432	1317	4.64432	1015
4.64394	1318	4.64394	1041
4.64355	1317	4.64355	1047
4.64317	1302	4.64317	1053
4.64279	1296	4.64279	1081
4.6424	1269	4.6424	1085
4.64202	1241	4.64202	1093
4.64164	1230	4.64164	1095
4.64125	1184	4.64125	1098
4.64087	1171	4.64087	1088
4.64048	1160	4.64048	1087
4.6401	1117	4.6401	1077
4.63972	1108	4.63972	1029
4.63933	1096	4.63933	1017
4.63895	1066	4.63895	1002
4.63857	1061	4.63857	953
4.63818	1036	4.63818	943
4.6378	1028	4.6378	908
4.63742	1022	4.63742	897
4.63703	998	4.63703	891
4.63665	993	4.63665	869
4.63626	991	4.63626	865
4.63588	989	4.63588	862
4.6355	988	4.6355	851
4.63511	987	4.63511	849
4.63473	986	4.63473	847
4.63435	987	4.63435	846
4.63396	999	4.63396	845
4.63358	1002	4.63358	842
4.63319	1006	4.63319	842
4.63281	1022	4.63281	843
4.63243	1026	4.63243	850
4.63204	1030	4.63204	852
4.63166	1043	4.63166	855
4.63128	1046	4.63128	868
4.63089	1060	4.63089	871
4.63051	1067	4.63051	883
4.63012	1074	4.63012	891
4.62974	1113	4.62974	897
4.62936	1124	4.62936	928
4.62897	1135	4.62897	936
4.62859	1181	4.62859	944
4.62821	1192	4.62821	976
4.62782	1207	4.62782	984
4.62744	1258	4.62744	995
4.62706	1268	4.62706	1035
4.62667	1327	4.62667	1044
4.62629	1348	4.62629	1088
4.6259	1366	4.6259	1104
4.62552	1444	4.62552	1116
4.62514	1463	4.62514	1168
4.62475	1485	4.62475	1181
4.62437	1573	4.62437	1195
4.62399	1603	4.62399	1259
4.6236	1699	4.6236	1276
4.62322	1795	4.62322	1331
4.62283	1830	4.62283	1387
4.62245	2014	4.62245	1407
4.62207	2075	4.62207	1526
4.62168	2134	4.62168	1563
4.6213	2419	4.6213	1603
4.62092	2481	4.62092	1780
4.62053	2562	4.62053	1820
4.62015	2844	4.62015	1869
4.61977	2904	4.61977	2059
4.61938	3204	4.61938	2108
4.619	3318	4.619	2314
4.61861	3391	4.61861	2393
4.61823	3618	4.61823	2443
4.61785	3634	4.61785	2591
4.61746	3639	4.61746	2607
4.61708	3700	4.61708	2612
4.6167	3698	4.6167	2657
4.61631	3680	4.61631	2655
4.61593	3550	4.61593	2630
4.61554	3514	4.61554	2513
4.61516	3252	4.61516	2472
4.61478	3165	4.61478	2199
4.61439	3099	4.61439	2110
4.61401	2805	4.61401	2042
4.61363	2750	4.61363	1759
4.61324	2679	4.61324	1703
4.61286	2428	4.61286	1644
4.61248	2375	4.61248	1441
4.61209	2201	4.61209	1398
4.61171	2107	4.61171	1269
4.61132	2068	4.61132	1205
4.61094	1906	4.61094	1181
4.61056	1866	4.61056	1084
4.61017	1825	4.61017	1059
4.60979	1669	4.60979	1035
4.60941	1640	4.60941	950
4.60902	1601	4.60902	935
4.60864	1495	4.60864	916
4.60825	1470	4.60825	862
4.60787	1372	4.60787	850
4.60749	1347	4.60749	806
4.6071	1329	4.6071	796
4.60672	1256	4.60672	789
4.60634	1238	4.60634	760
4.60595	1221	4.60595	753
4.60557	1154	4.60557	745
4.60519	1142	4.60519	722
4.6048	1117	4.6048	719
4.60442	1092	4.60442	712
4.60403	1084	4.60403	705
4.60365	1050	4.60365	702
4.60327	1041	4.60327	692
4.60288	1035	4.60288	690
4.6025	1004	4.6025	690
4.60212	997	4.60212	687
4.60173	989	4.60173	688
4.60135	961	4.60135	690
4.60096	955	4.60096	688
4.60058	933	4.60058	687
4.6002	923	4.6002	677
4.59981	918	4.59981	675
4.59943	897	4.59943	673
4.59905	893	4.59905	667
4.59866	889	4.59866	667
4.59828	869	4.59828	666
4.5979	864	4.5979	669
4.59751	858	4.59751	669
4.59713	841	4.59713	670
4.59674	839	4.59674	670
4.59636	827	4.59636	669
4.59598	824	4.59598	667
4.59559	822	4.59559	666
4.59521	810	4.59521	665
4.59483	807	4.59483	662
4.59444	804	4.59444	661
4.59406	794	4.59406	660
4.59367	793	4.59367	660
4.59329	790	4.59329	661
4.59291	789	4.59291	662
4.59252	789	4.59252	663
4.59214	789	4.59214	662
4.59176	789	4.59176	659
4.59137	790	4.59137	657
4.59099	799	4.59099	656
4.59061	802	4.59061	658
4.59022	806	4.59022	658
4.58984	821	4.58984	659
4.58945	824	4.58945	659
4.58907	837	4.58907	659
4.58869	840	4.58869	665
4.5883	841	4.5883	667
4.58792	845	4.58792	668
4.58754	845	4.58754	671
4.58715	844	4.58715	671
4.58677	832	4.58677	672
4.58638	827	4.58638	672
4.586	808	4.586	671
4.58562	786	4.58562	666
4.58523	778	4.58523	660
4.58485	744	4.58485	658
4.58447	735	4.58447	648
4.58408	730	4.58408	645
4.5837	714	4.5837	641
4.58332	712	4.58332	621
4.58293	709	4.58293	616
4.58255	705	4.58255	610
4.58216	705	4.58216	592
4.58178	705	4.58178	589
4.5814	705	4.5814	584
4.58101	705	4.58101	582
4.58063	706	4.58063	581
4.58025	708	4.58025	581
4.57986	711	4.57986	582
4.57948	729	4.57948	583
4.57909	732	4.57909	586
4.57871	738	4.57871	587
4.57833	754	4.57833	588
4.57794	759	4.57794	592
4.57756	776	4.57756	594
4.57718	781	4.57718	608
4.57679	786	4.57679	612
4.57641	806	4.57641	615
4.57602	809	4.57602	628
4.57564	810	4.57564	631
4.57526	819	4.57526	633
4.57487	817	4.57487	644
4.57449	812	4.57449	646
4.57411	801	4.57411	646
4.57372	797	4.57372	643
4.57334	769	4.57334	642
4.57296	763	4.57296	631
4.57257	756	4.57257	629
4.57219	725	4.57219	626
4.5718	720	4.5718	607
4.57142	713	4.57142	601
4.57104	695	4.57104	595
4.57065	691	4.57065	575
4.57027	674	4.57027	570
4.56989	672	4.56989	555
4.5695	669	4.5695	553
4.56912	673	4.56912	552
4.56873	674	4.56873	552
4.56835	675	4.56835	552
4.56797	678	4.56797	551
4.56758	679	4.56758	553
4.5672	679	4.5672	554
4.56682	679	4.56682	559
4.56643	680	4.56643	566
4.56605	685	4.56605	568
4.56567	689	4.56567	579
4.56528	692	4.56528	582
4.5649	709	4.5649	585
4.56451	713	4.56451	599
4.56413	718	4.56413	602
4.56375	734	4.56375	605
4.56336	739	4.56336	620
4.56298	763	4.56298	625
4.5626	776	4.5626	641
4.56221	783	4.56221	651
4.56183	817	4.56183	656
4.56144	824	4.56144	681
4.56106	830	4.56106	688
4.56068	853	4.56068	694
4.56029	855	4.56029	719
4.55991	861	4.55991	724
4.55953	858	4.55953	734
4.55914	857	4.55914	749
4.55876	839	4.55876	750
4.55838	835	4.55838	754
4.55799	830	4.55799	755
4.55761	805	4.55761	756
4.55722	800	4.55722	753
4.55684	796	4.55684	751
4.55646	783	4.55646	744
4.55607	780	4.55607	712
4.55569	776	4.55569	705
4.55531	772	4.55531	692
4.55492	771	4.55492	678
4.55454	768	4.55454	676
4.55415	767	4.55415	670
4.55377	766	4.55377	668
4.55339	765	4.55339	666
4.553	765	4.553	659
4.55262	765	4.55262	657
4.55224	766	4.55224	656
4.55185	767	4.55185	651
4.55147	772	4.55147	651
4.55109	777	4.55109	654
4.5507	781	4.5507	656
4.55032	801	4.55032	657
4.54993	805	4.54993	666
4.54955	809	4.54955	667
4.54917	825	4.54917	668
4.54878	827	4.54878	671
4.5484	828	4.5484	670
4.54802	824	4.54802	669
4.54763	823	4.54763	665
4.54725	809	4.54725	664
4.54686	804	4.54686	655
4.54648	798	4.54648	652
4.5461	771	4.5461	650
4.54571	765	4.54571	638
4.54533	758	4.54533	636
4.54495	729	4.54495	632
4.54456	723	4.54456	613
4.54418	701	4.54418	609
4.5438	689	4.5438	587
4.54341	683	4.54341	577
4.54303	660	4.54303	572
4.54264	655	4.54264	551
4.54226	651	4.54226	547
4.54188	635	4.54188	545
4.54149	631	4.54149	537
4.54111	626	4.54111	535
4.54073	618	4.54073	533
4.54034	617	4.54034	528
4.53996	612	4.53996	527
4.53957	611	4.53957	521
4.53919	610	4.53919	519
4.53881	609	4.53881	518
4.53842	609	4.53842	515
4.53804	609	4.53804	517
4.53766	606	4.53766	517
4.53727	606	4.53727	515
4.53689	604	4.53689	515
4.53651	603	4.53651	513
4.53612	602	4.53612	510
4.53574	602	4.53574	509
4.53535	601	4.53535	505
4.53497	599	4.53497	506
4.53459	599	4.53459	507
4.5342	599	4.5342	513
4.53382	599	4.53382	515
4.53344	600	4.53344	515
4.53305	602	4.53305	512
4.53267	605	4.53267	511
4.53228	606	4.53228	509
4.5319	606	4.5319	509
4.53152	604	4.53152	510
4.53113	603	4.53113	506
4.53075	601	4.53075	504
4.53037	596	4.53037	502
4.52998	594	4.52998	496
4.5296	590	4.5296	495
4.52922	584	4.52922	493
4.52883	583	4.52883	493
4.52845	577	4.52845	495
4.52806	576	4.52806	499
4.52768	576	4.52768	499
4.5273	578	4.5273	500
4.52691	579	4.52691	507
4.52653	580	4.52653	508
4.52615	580	4.52615	509
4.52576	581	4.52576	509
4.52538	582	4.52538	509
4.52499	581	4.52499	505
4.52461	580	4.52461	506
4.52423	579	4.52423	508
4.52384	580	4.52384	517
4.52346	580	4.52346	518
4.52308	585	4.52308	520
4.52269	586	4.52269	526
4.52231	589	4.52231	528
4.52193	594	4.52193	530
4.52154	595	4.52154	533
4.52116	601	4.52116	533
4.52077	603	4.52077	534
4.52039	604	4.52039	536
4.52001	606	4.52001	537
4.51962	606	4.51962	548
4.51924	605	4.51924	551
4.51886	606	4.51886	553
4.51847	607	4.51847	563
4.51809	610	4.51809	565
4.5177	614	4.5177	570
4.51732	616	4.51732	576
4.51694	626	4.51694	578
4.51655	629	4.51655	588
4.51617	631	4.51617	590
4.51579	644	4.51579	593
4.5154	647	4.5154	605
4.51502	650	4.51502	608
4.51463	656	4.51463	611
4.51425	658	4.51425	624
4.51387	665	4.51387	626
4.51348	667	4.51348	639
4.5131	669	4.5131	644
4.51272	678	4.51272	647
4.51233	680	4.51233	655
4.51195	680	4.51195	656
4.51157	683	4.51157	658
4.51118	682	4.51118	657
4.5108	679	4.5108	656
4.51041	668	4.51041	654
4.51003	665	4.51003	649
4.50965	651	4.50965	648
4.50926	646	4.50926	640
4.50888	644	4.50888	637
4.5085	634	4.5085	632
4.50811	633	4.50811	616
4.50773	632	4.50773	613
4.50734	633	4.50734	608
4.50696	632	4.50696	593
4.50658	632	4.50658	591
4.50619	632	4.50619	584
4.50581	632	4.50581	582
4.50543	632	4.50543	582
4.50504	633	4.50504	582
4.50466	633	4.50466	583
4.50428	632	4.50428	583
4.50389	631	4.50389	581
4.50351	631	4.50351	581
4.50312	629	4.50312	579
4.50274	630	4.50274	578
4.50236	636	4.50236	579
4.50197	639	4.50197	585
4.50159	640	4.50159	587
4.50121	652	4.50121	588
4.50082	654	4.50082	601
4.50044	657	4.50044	605
4.50005	667	4.50005	608
4.49967	670	4.49967	622
4.49929	673	4.49929	625
4.4989	677	4.4989	632
4.49852	678	4.49852	646
4.49814	683	4.49814	649
4.49775	682	4.49775	664
4.49737	683	4.49737	667
4.49699	682	4.49699	669
4.4966	682	4.4966	676
4.49622	682	4.49622	677
4.49583	683	4.49583	677
4.49545	684	4.49545	674
4.49507	686	4.49507	673
4.49468	686	4.49468	671
4.4943	686	4.4943	668
4.49392	683	4.49392	667
4.49353	681	4.49353	663
4.49315	680	4.49315	662
4.49276	672	4.49276	661
4.49238	670	4.49238	652
4.492	665	4.492	648
4.49161	653	4.49161	639
4.49123	650	4.49123	619
4.49085	634	4.49085	614
4.49046	630	4.49046	598
4.49008	628	4.49008	595
4.4897	621	4.4897	593
4.48931	619	4.48931	586
4.48893	619	4.48893	586
4.48854	616	4.48854	585
4.48816	616	4.48816	587
4.48778	618	4.48778	588
4.48739	622	4.48739	589
4.48701	622	4.48701	592
4.48663	627	4.48663	592
4.48624	629	4.48624	593
4.48586	630	4.48586	594
4.48547	637	4.48547	596
4.48509	639	4.48509	607
4.48471	642	4.48471	609
4.48432	650	4.48432	614
4.48394	653	4.48394	635
4.48356	662	4.48356	639
4.48317	666	4.48317	660
4.48279	668	4.48279	667
4.48241	676	4.48241	672
4.48202	678	4.48202	690
4.48164	679	4.48164	693
4.48125	680	4.48125	694
4.48087	678	4.48087	704
4.48049	674	4.48049	705
4.4801	668	4.4801	709
4.47972	667	4.47972	709
4.47934	659	4.47934	707
4.47895	657	4.47895	685
4.47857	656	4.47857	679
4.47818	650	4.47818	673
4.4778	649	4.4778	649
4.47742	646	4.47742	644
4.47703	635	4.47703	639
4.47665	632	4.47665	624
4.47627	623	4.47627	622
4.47588	618	4.47588	612
4.4755	618	4.4755	607
4.47512	615	4.47512	605
4.47473	616	4.47473	596
4.47435	617	4.47435	594
4.47396	617	4.47396	592
4.47358	617	4.47358	587
4.4732	617	4.4732	586
4.47281	614	4.47281	584
4.47243	613	4.47243	579
4.47205	609	4.47205	578
4.47166	607	4.47166	572
4.47128	606	4.47128	571
4.47089	599	4.47089	570
4.47051	597	4.47051	564
4.47013	596	4.47013	563
4.46974	595	4.46974	560
4.46936	595	4.46936	550
4.46898	596	4.46898	549
4.46859	598	4.46859	546
4.46821	599	4.46821	547
4.46783	602	4.46783	548
4.46744	604	4.46744	553
4.46706	604	4.46706	554
4.46667	606	4.46667	556
4.46629	606	4.46629	565
4.46591	606	4.46591	568
4.46552	604	4.46552	571
4.46514	603	4.46514	577
4.46476	603	4.46476	579
4.46437	602	4.46437	584
4.46399	602	4.46399	587
4.4636	601	4.4636	588
4.46322	601	4.46322	589
4.46284	602	4.46284	588
4.46245	606	4.46245	588
4.46207	605	4.46207	588
4.46169	604	4.46169	587
4.4613	605	4.4613	588
4.46092	604	4.46092	592
4.46053	611	4.46053	592
4.46015	612	4.46015	590
4.45977	613	4.45977	590
4.45938	620	4.45938	590
4.459	622	4.459	587
4.45862	625	4.45862	588
4.45823	635	4.45823	589
4.45785	637	4.45785	596
4.45747	644	4.45747	597
4.45708	649	4.45708	603
4.4567	650	4.4567	603
4.45631	655	4.45631	604
4.45593	657	4.45593	612
4.45555	659	4.45555	614
4.45516	666	4.45516	616
4.45478	668	4.45478	621
4.4544	672	4.4544	622
4.45401	679	4.45401	624
4.45363	681	4.45363	630
4.45324	690	4.45324	632
4.45286	692	4.45286	643
4.45248	696	4.45248	646
4.45209	709	4.45209	650
4.45171	712	4.45171	669
4.45133	715	4.45133	674
4.45094	729	4.45094	679
4.45056	731	4.45056	696
4.45018	737	4.45018	699
4.44979	744	4.44979	703
4.44941	746	4.44941	706
4.44902	752	4.44902	708
4.44864	753	4.44864	715
4.44826	754	4.44826	717
4.44787	754	4.44787	718
4.44749	755	4.44749	724
4.44711	755	4.44711	725
4.44672	758	4.44672	727
4.44634	759	4.44634	731
4.44595	766	4.44595	733
4.44557	770	4.44557	741
4.44519	772	4.44519	745
4.4448	787	4.4448	747
4.44442	792	4.44442	760
4.44404	797	4.44404	764
4.44365	813	4.44365	768
4.44327	816	4.44327	784
4.44289	821	4.44289	788
4.4425	835	4.4425	792
4.44212	838	4.44212	808
4.44173	850	4.44173	811
4.44135	854	4.44135	827
4.44097	857	4.44097	832
4.44058	870	4.44058	836
4.4402	873	4.4402	856
4.43982	877	4.43982	861
4.43943	893	4.43943	866
4.43905	897	4.43905	883
4.43866	913	4.43866	887
4.43828	922	4.43828	904
4.4379	927	4.4379	915
4.43751	953	4.43751	922
4.43713	959	4.43713	950
4.43675	966	4.43675	957
4.43636	991	4.43636	965
4.43598	995	4.43598	994
4.4356	999	4.4356	1001
4.43521	1008	4.43521	1012
4.43483	1009	4.43483	1042
4.43444	1009	4.43444	1047
4.43406	1008	4.43406	1061
4.43368	1007	4.43368	1062
4.43329	1003	4.43329	1061
4.43291	1002	4.43291	1052
4.43253	1001	4.43253	1051
4.43214	999	4.43214	1048
4.43176	1000	4.43176	1028
4.43137	1007	4.43137	1024
4.43099	1018	4.43099	1015
4.43061	1021	4.43061	1010
4.43022	1044	4.43022	1009
4.42984	1052	4.42984	1009
4.42946	1059	4.42946	1010
4.42907	1086	4.42907	1011
4.42869	1092	4.42869	1029
4.42831	1099	4.42831	1034
4.42792	1131	4.42792	1041
4.42754	1139	4.42754	1071
4.42715	1172	4.42715	1078
4.42677	1185	4.42677	1104
4.42639	1194	4.42639	1115
4.426	1230	4.426	1121
4.42562	1239	4.42562	1147
4.42524	1246	4.42524	1152
4.42485	1276	4.42485	1156
4.42447	1282	4.42447	1172
4.42408	1291	4.42408	1175
4.4237	1315	4.4237	1181
4.42332	1320	4.42332	1200
4.42293	1350	4.42293	1205
4.42255	1359	4.42255	1235
4.42217	1366	4.42217	1243
4.42178	1399	4.42178	1250
4.4214	1407	4.4214	1281
4.42102	1417	4.42102	1288
4.42063	1451	4.42063	1297
4.42025	1459	4.42025	1329
4.41986	1479	4.41986	1336
4.41948	1502	4.41948	1361
4.4191	1511	4.4191	1386
4.41871	1562	4.41871	1397
4.41833	1576	4.41833	1451
4.41795	1588	4.41795	1464
4.41756	1657	4.41756	1478
4.41718	1676	4.41718	1551
4.41679	1699	4.41679	1570
4.41641	1783	4.41641	1595
4.41603	1801	4.41603	1681
4.41564	1870	4.41564	1701
4.41526	1894	4.41526	1781
4.41488	1898	4.41488	1809
4.41449	1912	4.41449	1818
4.41411	1912	4.41411	1846
4.41373	1911	4.41373	1850
4.41334	1896	4.41334	1854
4.41296	1886	4.41296	1842
4.41257	1856	4.41257	1838
4.41219	1785	4.41219	1796
4.41181	1767	4.41181	1708
4.41142	1683	4.41142	1686
4.41104	1660	4.41104	1578
4.41066	1641	4.41066	1548
4.41027	1565	4.41027	1521
4.40989	1549	4.40989	1411
4.4095	1529	4.4095	1387
4.40912	1475	4.40912	1357
4.40874	1468	4.40874	1279
4.40835	1447	4.40835	1266
4.40797	1441	4.40797	1222
4.40759	1436	4.40759	1208
4.4072	1418	4.4072	1198
4.40682	1414	4.40682	1160
4.40643	1413	4.40643	1153
4.40605	1408	4.40605	1151
4.40567	1407	4.40567	1141
4.40528	1407	4.40528	1141
4.4049	1411	4.4049	1140
4.40452	1412	4.40452	1141
4.40413	1422	4.40413	1141
4.40375	1426	4.40375	1149
4.40337	1429	4.40337	1151
4.40298	1445	4.40298	1153
4.4026	1450	4.4026	1170
4.40221	1457	4.40221	1175
4.40183	1492	4.40183	1182
4.40145	1499	4.40145	1208
4.40106	1524	4.40106	1213
4.40068	1548	4.40068	1231
4.4003	1558	4.4003	1248
4.39991	1608	4.39991	1255
4.39953	1621	4.39953	1292
4.39914	1633	4.39914	1303
4.39876	1679	4.39876	1312
4.39838	1686	4.39838	1352
4.39799	1689	4.39799	1361
4.39761	1707	4.39761	1370
4.39723	1706	4.39723	1403
4.39684	1696	4.39684	1407
4.39646	1695	4.39646	1428
4.39608	1693	4.39608	1431
4.39569	1655	4.39569	1433
4.39531	1644	4.39531	1419
4.39492	1633	4.39492	1418
4.39454	1593	4.39454	1415
4.39416	1588	4.39416	1385
4.39377	1581	4.39377	1378
4.39339	1571	4.39339	1361
4.39301	1571	4.39301	1336
4.39262	1571	4.39262	1329
4.39224	1572	4.39224	1291
4.39185	1573	4.39185	1282
4.39147	1575	4.39147	1276
4.39109	1572	4.39109	1252
4.3907	1568	4.3907	1247
4.39032	1539	4.39032	1240
4.38994	1528	4.38994	1215
4.38955	1471	4.38955	1207
4.38917	1442	4.38917	1171
4.38879	1426	4.38879	1154
4.3884	1363	4.3884	1143
4.38802	1353	4.38802	1086
4.38763	1343	4.38763	1071
4.38725	1312	4.38725	1060
4.38687	1308	4.38687	1009
4.38648	1304	4.38648	998
4.3861	1289	4.3861	984
4.38572	1289	4.38572	955
4.38533	1300	4.38533	953
4.38495	1301	4.38495	956
4.38456	1304	4.38456	956
4.38418	1332	4.38418	957
4.3838	1341	4.3838	962
4.38341	1351	4.38341	964
4.38303	1390	4.38303	968
4.38265	1399	4.38265	987
4.38226	1413	4.38226	991
4.38188	1430	4.38188	1002
4.3815	1433	4.3815	1014
4.38111	1444	4.38111	1017
4.38073	1447	4.38073	1029
4.38034	1450	4.38034	1032
4.37996	1460	4.37996	1034
4.37958	1463	4.37958	1044
4.37919	1469	4.37919	1046
4.37881	1489	4.37881	1049
4.37843	1494	4.37843	1062
4.37804	1524	4.37804	1064
4.37766	1537	4.37766	1084
4.37727	1547	4.37727	1093
4.37689	1594	4.37689	1100
4.37651	1604	4.37651	1136
4.37612	1610	4.37612	1144
4.37574	1642	4.37574	1153
4.37536	1644	4.37536	1187
4.37497	1649	4.37497	1189
4.37459	1643	4.37459	1192
4.37421	1638	4.37421	1200
4.37382	1578	4.37382	1200
4.37344	1555	4.37344	1171
4.37305	1534	4.37305	1162
4.37267	1436	4.37267	1150
4.37229	1414	4.37229	1068
4.3719	1388	4.3719	1049
4.37152	1293	4.37152	1025
4.37114	1273	4.37114	941
4.37075	1212	4.37075	925
4.37037	1175	4.37037	863
4.36998	1159	4.36998	826
4.3696	1088	4.3696	809
4.36922	1074	4.36922	744
4.36883	1065	4.36883	735
4.36845	1030	4.36845	726
4.36807	1024	4.36807	697
4.36768	1018	4.36768	690
4.3673	1007	4.3673	684
4.36692	1007	4.36692	671
4.36653	1008	4.36653	670
4.36615	1010	4.36615	664
4.36576	1010	4.36576	667
4.36538	1012	4.36538	668
4.365	1013	4.365	677
4.36461	1014	4.36461	679
4.36423	1014	4.36423	681
4.36385	1013	4.36385	692
4.36346	1006	4.36346	694
4.36308	999	4.36308	699
4.36269	995	4.36269	700
4.36231	975	4.36231	702
4.36193	971	4.36193	697
4.36154	966	4.36154	696
4.36116	945	4.36116	694
4.36078	940	4.36078	676
4.36039	933	4.36039	670
4.36001	910	4.36001	663
4.35963	905	4.35963	642
4.35924	883	4.35924	638
4.35886	874	4.35886	624
4.35847	869	4.35847	619
4.35809	848	4.35809	617
4.35771	844	4.35771	615
4.35732	841	4.35732	616
4.35694	833	4.35694	616
4.35656	833	4.35656	616
4.35617	833	4.35617	617
4.35579	836	4.35579	618
4.3554	836	4.3554	612
4.35502	837	4.35502	611
4.35464	837	4.35464	608
4.35425	836	4.35425	607
4.35387	847	4.35387	607
4.35349	850	4.35349	606
4.3531	854	4.3531	606
4.35272	867	4.35272	607
4.35234	870	4.35234	614
4.35195	878	4.35195	616
4.35157	883	4.35157	621
4.35118	884	4.35118	621
4.3508	890	4.3508	621
4.35042	889	4.35042	618
4.35003	887	4.35003	617
4.34965	870	4.34965	616
4.34927	866	4.34927	608
4.34888	858	4.34888	606
4.3485	825	4.3485	603
4.34811	814	4.34811	590
4.34773	772	4.34773	585
4.34735	760	4.34735	552
4.34696	750	4.34696	542
4.34658	706	4.34658	534
4.3462	697	4.3462	499
4.34581	689	4.34581	492
4.34543	658	4.34543	485
4.34504	651	4.34504	462
4.34466	633	4.34466	457
4.34428	615	4.34428	444
4.34389	610	4.34389	431
4.34351	590	4.34351	428
4.34313	584	4.34313	414
4.34274	579	4.34274	411
4.34236	561	4.34236	410
4.34198	558	4.34198	404
4.34159	555	4.34159	404
4.34121	542	4.34121	404
4.34082	539	4.34082	407
4.34044	532	4.34044	407
4.34006	528	4.34006	411
4.33967	527	4.33967	414
4.33929	528	4.33929	415
4.33891	529	4.33891	422
4.33852	530	4.33852	423
4.33814	537	4.33814	423
4.33775	538	4.33775	422
4.33737	540	4.33737	421
4.33699	544	4.33699	418
4.3366	544	4.3366	424
4.33622	547	4.33622	425
4.33584	547	4.33584	434
4.33545	547	4.33545	437
4.33507	545	4.33507	438
4.33469	544	4.33469	443
4.3343	543	4.3343	443
4.33392	541	4.33392	443
4.33353	540	4.33353	441
4.33315	534	4.33315	441
4.33277	527	4.33277	436
4.33238	525	4.33238	431
4.332	518	4.332	430
4.33162	516	4.33162	426
4.33123	515	4.33123	425
4.33085	516	4.33085	424
4.33046	517	4.33046	418
4.33008	517	4.33008	417
4.3297	519	4.3297	415
4.32931	518	4.32931	415
4.32893	515	4.32893	416
4.32855	513	4.32855	422
4.32816	512	4.32816	423
4.32778	509	4.32778	424
4.3274	508	4.3274	426
4.32701	508	4.32701	426
4.32663	511	4.32663	425
4.32624	512	4.32624	425
4.32586	516	4.32586	426
4.32548	516	4.32548	427
4.32509	517	4.32509	425
4.32471	515	4.32471	424
4.32433	513	4.32433	420
4.32394	512	4.32394	418
4.32356	509	4.32356	417
4.32317	508	4.32317	411
4.32279	507	4.32279	409
4.32241	506	4.32241	407
4.32202	506	4.32202	396
4.32164	507	4.32164	395
4.32126	508	4.32126	390
4.32087	507	4.32087	388
4.32049	502	4.32049	388
4.32011	501	4.32011	389
4.31972	501	4.31972	389
4.31934	498	4.31934	390
4.31895	498	4.31895	391
4.31857	499	4.31857	392
4.31819	506	4.31819	393
4.3178	507	4.3178	396
4.31742	517	4.31742	396
4.31704	520	4.31704	400
4.31665	522	4.31665	402
4.31627	527	4.31627	403
4.31588	528	4.31588	409
4.3155	530	4.3155	410
4.31512	533	4.31512	412
4.31473	534	4.31473	415
4.31435	534	4.31435	416
4.31397	532	4.31397	416
4.31358	531	4.31358	419
4.3132	528	4.3132	420
4.31282	528	4.31282	420
4.31243	528	4.31243	418
4.31205	528	4.31205	417
4.31166	528	4.31166	415
4.31128	527	4.31128	414
4.3109	514	4.3109	412
4.31051	511	4.31051	401
4.31013	495	4.31013	398
4.30975	490	4.30975	385
4.30936	487	4.30936	380
4.30898	474	4.30898	378
4.30859	472	4.30859	369
4.30821	470	4.30821	370
4.30783	463	4.30783	370
4.30744	463	4.30744	369
4.30706	463	4.30706	369
4.30668	462	4.30668	368
4.30629	461	4.30629	367
4.30591	460	4.30591	367
4.30553	458	4.30553	364
4.30514	457	4.30514	362
4.30476	453	4.30476	360
4.30437	452	4.30437	353
4.30399	450	4.30399	352
4.30361	445	4.30361	351
4.30322	444	4.30322	349
4.30284	445	4.30284	348
4.30246	448	4.30246	345
4.30207	449	4.30207	344
4.30169	450	4.30169	344
4.3013	448	4.3013	345
4.30092	447	4.30092	346
4.30054	446	4.30054	347
4.30015	446	4.30015	350
4.29977	445	4.29977	351
4.29939	445	4.29939	352
4.299	446	4.299	356
4.29862	448	4.29862	359
4.29824	449	4.29824	366
4.29785	449	4.29785	367
4.29747	449	4.29747	368
4.29708	449	4.29708	370
4.2967	448	4.2967	370
4.29632	449	4.29632	371
4.29593	449	4.29593	371
4.29555	451	4.29555	372
4.29517	454	4.29517	372
4.29478	455	4.29478	367
4.2944	458	4.2944	366
4.29401	459	4.29401	361
4.29363	459	4.29363	359
4.29325	461	4.29325	358
4.29286	462	4.29286	355
4.29248	463	4.29248	354
4.2921	471	4.2921	353
4.29171	471	4.29171	352
4.29133	468	4.29133	351
4.29094	466	4.29094	350
4.29056	466	4.29056	349
4.29018	465	4.29018	348
4.28979	465	4.28979	355
4.28941	466	4.28941	356
4.28903	466	4.28903	359
4.28864	468	4.28864	372
4.28826	468	4.28826	374
4.28788	466	4.28788	378
4.28749	465	4.28749	379
4.28711	460	4.28711	379
4.28672	459	4.28672	369
4.28634	457	4.28634	367
4.28596	451	4.28596	366
4.28557	450	4.28557	358
4.28519	448	4.28519	360
4.28481	444	4.28481	361
4.28442	444	4.28442	364
4.28404	444	4.28404	366
4.28365	443	4.28365	365
4.28327	444	4.28327	361
4.28289	444	4.28289	361
4.2825	444	4.2825	359
4.28212	445	4.28212	358
4.28174	447	4.28174	357
4.28135	448	4.28135	353
4.28097	449	4.28097	352
4.28059	450	4.28059	351
4.2802	451	4.2802	354
4.27982	452	4.27982	354
4.27943	454	4.27943	357
4.27905	456	4.27905	358
4.27867	464	4.27867	359
4.27828	466	4.27828	361
4.2779	468	4.2779	361
4.27752	473	4.27752	361
4.27713	474	4.27713	359
4.27675	474	4.27675	359
4.27636	472	4.27636	357
4.27598	471	4.27598	359
4.2756	467	4.2756	359
4.27521	465	4.27521	362
4.27483	464	4.27483	363
4.27445	455	4.27445	364
4.27406	454	4.27406	363
4.27368	452	4.27368	363
4.2733	450	4.2733	362
4.27291	450	4.27291	363
4.27253	449	4.27253	363
4.27214	448	4.27214	366
4.27176	447	4.27176	369
4.27138	447	4.27138	370
4.27099	446	4.27099	370
4.27061	445	4.27061	370
4.27023	439	4.27023	369
4.26984	437	4.26984	364
4.26946	434	4.26946	363
4.26907	433	4.26907	362
4.26869	432	4.26869	352
4.26831	434	4.26831	349
4.26792	435	4.26792	341
4.26754	435	4.26754	340
4.26716	440	4.26716	339
4.26677	440	4.26677	338
4.26639	440	4.26639	338
4.26601	440	4.26601	339
4.26562	440	4.26562	339
4.26524	442	4.26524	339
4.26485	445	4.26485	340
4.26447	446	4.26447	340
4.26409	453	4.26409	341
4.2637	453	4.2637	347
4.26332	453	4.26332	348
4.26294	450	4.26294	350
4.26255	450	4.26255	357
4.26217	448	4.26217	359
4.26178	441	4.26178	361
4.2614	440	4.2614	363
4.26102	440	4.26102	363
4.26063	440	4.26063	362
4.26025	439	4.26025	360
4.25987	435	4.25987	359
4.25948	434	4.25948	354
4.2591	433	4.2591	353
4.25872	433	4.25872	353
4.25833	433	4.25833	351
4.25795	433	4.25795	352
4.25756	433	4.25756	357
4.25718	433	4.25718	364
4.2568	430	4.2568	366
4.25641	434	4.25641	372
4.25603	436	4.25603	372
4.25565	448	4.25565	371
4.25526	452	4.25526	366
4.25488	454	4.25488	365
4.25449	463	4.25449	363
4.25411	464	4.25411	355
4.25373	466	4.25373	354
4.25334	468	4.25334	354
4.25296	468	4.25296	355
4.25258	468	4.25258	356
4.25219	468	4.25219	357
4.25181	468	4.25181	358
4.25143	469	4.25143	359
4.25104	469	4.25104	360
4.25066	471	4.25066	361
4.25027	475	4.25027	363
4.24989	476	4.24989	368
4.24951	482	4.24951	369
4.24912	484	4.24912	375
4.24874	485	4.24874	377
4.24836	490	4.24836	379
4.24797	490	4.24797	383
4.24759	490	4.24759	384
4.2472	498	4.2472	385
4.24682	500	4.24682	391
4.24644	508	4.24644	393
4.24605	514	4.24605	399
4.24567	517	4.24567	405
4.24529	530	4.24529	407
4.2449	534	4.2449	415
4.24452	537	4.24452	418
4.24414	551	4.24414	420
4.24375	554	4.24375	430
4.24337	562	4.24337	432
4.24298	588	4.24298	435
4.2426	594	4.2426	442
4.24222	620	4.24222	443
4.24183	630	4.24183	448
4.24145	635	4.24145	450
4.24107	658	4.24107	453
4.24068	663	4.24068	462
4.2403	665	4.2403	465
4.23991	675	4.23991	467
4.23953	677	4.23953	478
4.23915	681	4.23915	479
4.23876	672	4.23876	484
4.23838	671	4.23838	483
4.238	654	4.238	484
4.23761	649	4.23761	486
4.23723	643	4.23723	484
4.23684	620	4.23684	482
4.23646	614	4.23646	465
4.23608	609	4.23608	461
4.23569	587	4.23569	456
4.23531	583	4.23531	444
4.23493	569	4.23493	441
4.23454	564	4.23454	428
4.23416	561	4.23416	424
[truncated: 7,126 more rows]
