# Supplementary material for: Dual-modal metabolic analysis reveals hypothermia-reversible uncoupling of oxidative phosphorylation in neonatal brain hypoxia-ischemia
Source: eLife. 2025 Dec 29;13:RP100129. doi: 10.7554/eLife.100129 (PMC12747520; doi:10.7554/eLife.100129)
Supplement: Supplementary file 1. — Data are shown in mean ± SD and compared to the “CCA-ligation” on its own side, unless indicated with a bracket. The p-values were determined by two-way ANOVA (n=5; *: P<0.05; **: P<0.01). [file elife-100129-supp1.xlsx]

## Sheet: Supplementary File 1
Normothermia	Contralateral (CL) Hemisphere
(37 °C)	CBF (mL/100g/min)	OEF	CMRO2 (mL/100g/min)
CCA-ligation	26.67 ± 2.86	0.21 ± 0.05	1.26 ± 0.25
Hypoxia-Ischemia	35.11 ± 1.87	0.44 ± 0.03	2.37 ± 0.36
Post-HI (0–40 mins)	36.92 ± 3.88	0.22 ± 0.07	1.80 ± 0.63
Post-HI (40–80 mins)	39.14 ± 4.53	0.23 ± 0.06	1.96 ± 0.55
Post-HI (80–120 mins)	41.85 ± 2.64	0.25 ± 0.09	2.28 ± 0.73
Normothermia	Ipsilateral (CL) Hemisphere
(37 °C)	CBF (mL/100g/min)	OEF	CMRO2 (mL/100g/min)
CCA-ligation	23.67 ± 5.21	0.30 ± 0.05	1.56 ± 0.31
Hypoxia-Ischemia	26.03 ± 3.43	0.25 ± 0.08	0.78 ± 0.18
Post-HI (0–40 mins)	28.31 ± 3.10	0.38 ± 0.12	2.30 ± 0.63
Post-HI (40–80 mins)	29.79 ± 5.32	0.36 ± 0.09	2.34 ± 0.68
Post-HI (80–120 mins)	30.48 ± 3.59	0.34 ± 0.07	2.39 ± 0.42
