# Supplementary material for: Dual-modal metabolic analysis reveals hypothermia-reversible uncoupling of oxidative phosphorylation in neonatal brain hypoxia-ischemia
Source: eLife. 2025 Dec 29;13:RP100129. doi: 10.7554/eLife.100129 (PMC12747520; doi:10.7554/eLife.100129)
Supplement: Supplementary file 2. — Data are shown in mean ± SD and compared to the “CCA-ligation” on its own side, unless indicated with a bracket. The p-values were determined by two-way ANOVA (n=5; ***: P<0.001; ****: P<0.0001). [file elife-100129-supp2.xlsx]

## Sheet: Supplementary File 2
Hypothermia	Contralateral (CL) Hemisphere
(32 °C)	CBF (mL/100g/min)	OEF	CMRO2 (mL/100g/min)
CCA-ligation	26.18 ± 3.06	0.23 ± 0.02	1.56 ± 0.41
Hypoxia-Ischemia	31.23 ± 4.96	0.42 ± 0.06	2.46 ± 0.49
Post-HI (0–40 mins)	36.06 ± 5.64	0.22 ± 0.02	1.64 ± 0.30
Post-HI (40–80 mins)	37.32 ± 2.75	0.21 ± 0.04	1.78 ± 0.16
Post-HI (80–120 mins)	38.97 ± 2.50	0.21 ± 0.05	1.62 ± 0.29
Hypothermia	Ipsilateral (CL) Hemisphere
(32 °C)	CBF (mL/100g/min)	OEF	CMRO2 (mL/100g/min)
CCA-ligation	24.61 ± 1.75	0.25 ± 0.02	1.55 ± 0.44
Hypoxia-Ischemia	28.13 ± 6.78	0.28 ± 0.05	0.90 ± 0.44
Post-HI (0–40 mins)	29.89 ± 4.46	0.25 ± 0.04	1.32 ± 0.44
Post-HI (40–80 mins)	28.90 ± 3.25	0.22 ± 0.02	1.38 ± 0.36
Post-HI (80–120 mins)	28.84 ± 3.22	0.22 ± 0.02	1.40 ± 0.38
